# Supplementary material for: Novel N-Substituted 3-Aryl-4-(diethoxyphosphoryl)azetidin-2-ones as Antibiotic Enhancers and Antiviral Agents in Search for a Successful Treatment of Complex Infections
Source: MDPI journal article supplement (doi:10.3390/ijms22158032), 2021-07-27
Supplement: s1 [file s1]

## Supplementary Materials

NMR spectra for compounds *cis*-**10**/*trans*-**10** and *cis*-**11**/*trans*-**11**:

Figure S1: <sup>1</sup>H NMR Spectrum for *cis*-**10b** in CDCl<sub>3</sub>

Figure S2: <sup>13</sup>C NMR Spectrum for *cis*-**10b** in CDCl<sub>3</sub>

Figure S3: <sup>31</sup>P NMR Spectrum for *cis*-**10b** in CDCl<sub>3</sub>

Figure S4: <sup>1</sup>H NMR Spectrum for *trans*-**10b** in CDCl<sub>3</sub>

Figure S5: <sup>13</sup>C NMR Spectrum for *trans*-**10b** in CDCl<sub>3</sub>

Figure S6: <sup>31</sup>P NMR Spectrum for *trans*-**10b** in CDCl<sub>3</sub>

Figure S7: <sup>1</sup>H NMR Spectrum for *trans*-**10c** in CDCl<sub>3</sub>

Figure S8: <sup>13</sup>C NMR Spectrum for *trans*-**10c** in CDCl<sub>3</sub>

Figure S9: <sup>31</sup>P NMR Spectrum for *trans*-**10c** in CDCl<sub>3</sub>

Figure S10: <sup>1</sup>H NMR Spectrum for *cis*-**10d** in CDCl<sub>3</sub>

Figure S11: <sup>13</sup>C NMR Spectrum for *cis*-**10d** in CDCl<sub>3</sub>

Figure S12: <sup>31</sup>P NMR Spectrum for *cis*-**10d** in CDCl<sub>3</sub>

Figure S13: <sup>1</sup>H NMR Spectrum for *trans*-**10d** in CDCl<sub>3</sub>

Figure S14: <sup>13</sup>C NMR Spectrum for *trans*-**10d** in CDCl<sub>3</sub>

Figure S15: <sup>31</sup>P NMR Spectrum for *trans*-**10d** in CDCl<sub>3</sub>

Figure S16: <sup>1</sup>H NMR Spectrum for *cis*-**10e** in CDCl<sub>3</sub>

Figure S17: <sup>13</sup>C NMR Spectrum for *cis*-**10e** in CDCl<sub>3</sub>

Figure S18: <sup>31</sup>P NMR Spectrum for *cis*-**10e** in CDCl<sub>3</sub>

Figure S19: <sup>1</sup>H NMR Spectrum for *trans*-**10e** in CDCl<sub>3</sub>

Figure S20: <sup>13</sup>C NMR Spectrum for *trans*-**10e** in CDCl<sub>3</sub>

Figure S21: <sup>31</sup>P NMR Spectrum for *trans*-**10e** in CDCl<sub>3</sub>

Figure S22: <sup>1</sup>H NMR Spectrum for *cis*-**10f** in CDCl<sub>3</sub>

Figure S23: <sup>13</sup>C NMR Spectrum for *cis*-**10f** in CDCl<sub>3</sub>

Figure S24: <sup>31</sup>P NMR Spectrum for *cis*-**10f** in CDCl<sub>3</sub>

Figure S25: <sup>1</sup>H NMR Spectrum for *trans*-**10f** in CDCl<sub>3</sub>

Figure S26: <sup>13</sup>C NMR Spectrum for *trans*-**10f** in CDCl<sub>3</sub>

Figure S27: <sup>31</sup>P NMR Spectrum for *trans*-**10f** in CDCl<sub>3</sub>

Figure S28: <sup>1</sup>H NMR Spectrum for *cis*-**11a** in CDCl<sub>3</sub>

Figure S29: <sup>13</sup>C NMR Spectrum for *cis*-**11a** in CDCl<sub>3</sub>

Figure S30: <sup>31</sup>P NMR Spectrum for *cis*-**11a** in CDCl<sub>3</sub>

Figure S31: <sup>1</sup>H NMR Spectrum for *trans*-**11a** in CDCl<sub>3</sub>

Figure S32: <sup>13</sup>C NMR Spectrum for *trans*-**11a** in CDCl<sub>3</sub>

Figure S33: <sup>31</sup>P NMR Spectrum for *trans*-**11a** in CDCl<sub>3</sub>

Figure S34: <sup>1</sup>H NMR Spectrum for *cis*-**11b** in CDCl<sub>3</sub>

Figure S35: <sup>13</sup>C NMR Spectrum for *cis*-**11b** in CDCl<sub>3</sub>

Figure S36: <sup>31</sup>P NMR Spectrum for *cis*-**11b** in CDCl<sub>3</sub>

Figure S37: <sup>1</sup>H NMR Spectrum for *trans*-**11b** in CDCl<sub>3</sub>

Figure S38: <sup>13</sup>C NMR Spectrum for *trans*-**11b** in CDCl<sub>3</sub>

Figure S39: <sup>31</sup>P NMR Spectrum for *trans*-**11b** in CDCl<sub>3</sub>

Figure S40: <sup>1</sup>H NMR Spectrum for *trans*-**11c** in CDCl<sub>3</sub>

Figure S41: <sup>13</sup>C NMR Spectrum for *trans*-**11c** in CDCl<sub>3</sub>

Figure S42: <sup>31</sup>P NMR Spectrum for *trans*-**11c** in CDCl<sub>3</sub>

Figure S43: <sup>1</sup>H NMR Spectrum for *cis*-**11d** in CDCl<sub>3</sub>

Figure S44: <sup>13</sup>C NMR Spectrum for *cis*-**11d** in CDCl<sub>3</sub>

Figure S45: <sup>31</sup>P NMR Spectrum for *cis*-**11d** in CDCl<sub>3</sub>

Figure S46: <sup>1</sup>H NMR Spectrum for *trans*-**11d** in CDCl<sub>3</sub>

Figure S47: <sup>13</sup>C NMR Spectrum for *trans*-**11d** in CDCl<sub>3</sub>

Figure S48: <sup>31</sup>P NMR Spectrum for *trans*-**11d** in CDCl<sub>3</sub>

Figure S49: <sup>1</sup>H NMR Spectrum for *cis*-**11e** in CDCl<sub>3</sub>

Figure S50: <sup>13</sup>C NMR Spectrum for *cis*-**11e** in CDCl<sub>3</sub>

Figure S51: <sup>31</sup>P NMR Spectrum for *cis*-**11e** in CDCl<sub>3</sub>

Figure S52:  $^1\text{H}$  NMR Spectrum for *trans*-**11e** in  $\text{CDCl}_3$   
 Figure S53:  $^{13}\text{C}$  NMR Spectrum for *trans*-**11e** in  $\text{CDCl}_3$   
 Figure S54:  $^{31}\text{P}$  NMR Spectrum for *trans*-**11e** in  $\text{CDCl}_3$   
 Figure S55:  $^1\text{H}$  NMR Spectrum for *cis*-**11f** in  $\text{CDCl}_3$   
 Figure S56:  $^{13}\text{C}$  NMR Spectrum for *cis*-**11f** in  $\text{CDCl}_3$   
 Figure S57:  $^{31}\text{P}$  NMR Spectrum for *cis*-**11f** in  $\text{CDCl}_3$   
 Figure S58:  $^1\text{H}$  NMR Spectrum for *trans*-**11f** in  $\text{CDCl}_3$   
 Figure S59:  $^{13}\text{C}$  NMR Spectrum for *trans*-**11f** in  $\text{CDCl}_3$   
 Figure S60:  $^{31}\text{P}$  NMR Spectrum for *trans*-**11f** in  $\text{CDCl}_3$

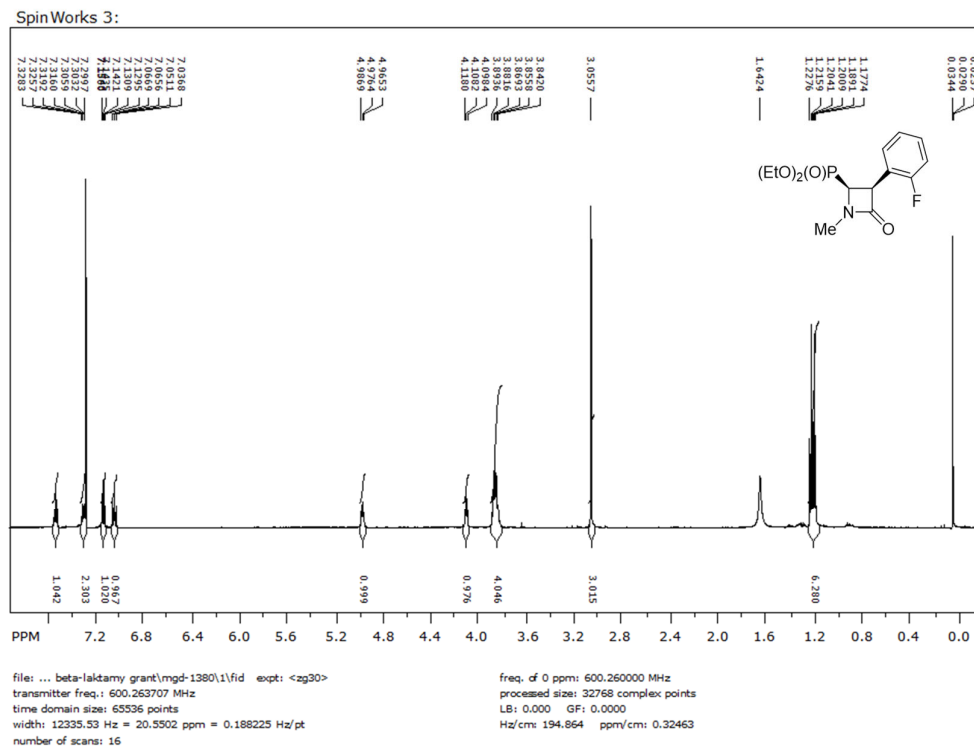

Figure S1.  $^1\text{H}$  NMR Spectrum for *cis*-**10b** in  $\text{CDCl}_3$ .

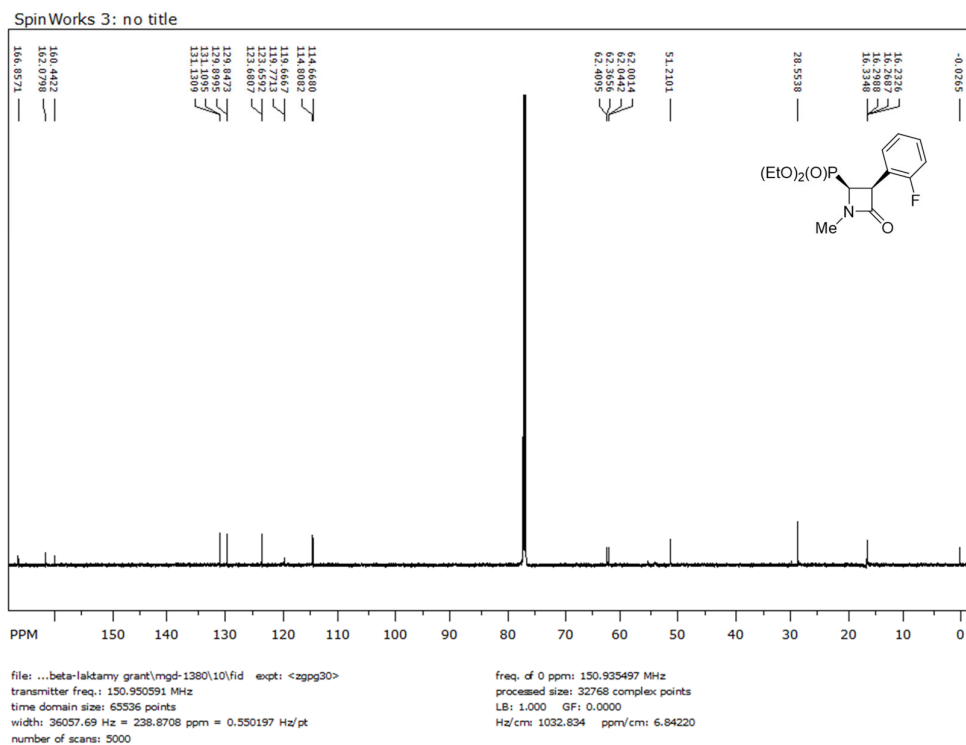

Figure S2.  $^{13}\text{C}$  NMR Spectrum for *cis*-10b in  $\text{CDCl}_3$ .

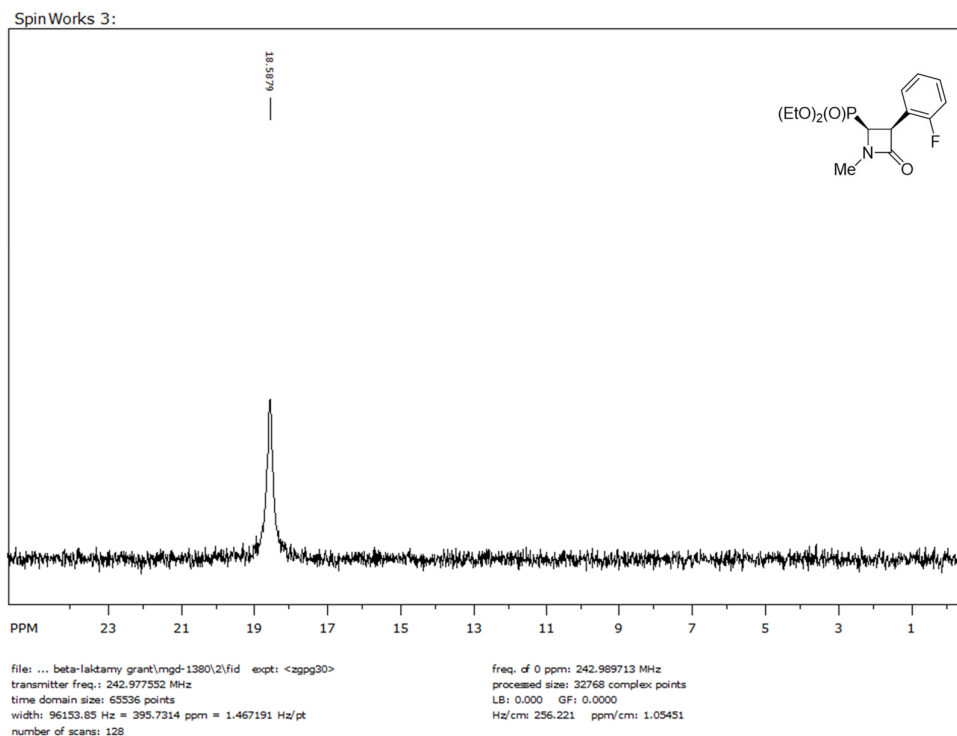

Figure S3.  $^{31}\text{P}$  NMR Spectrum for *cis*-10b in  $\text{CDCl}_3$ .





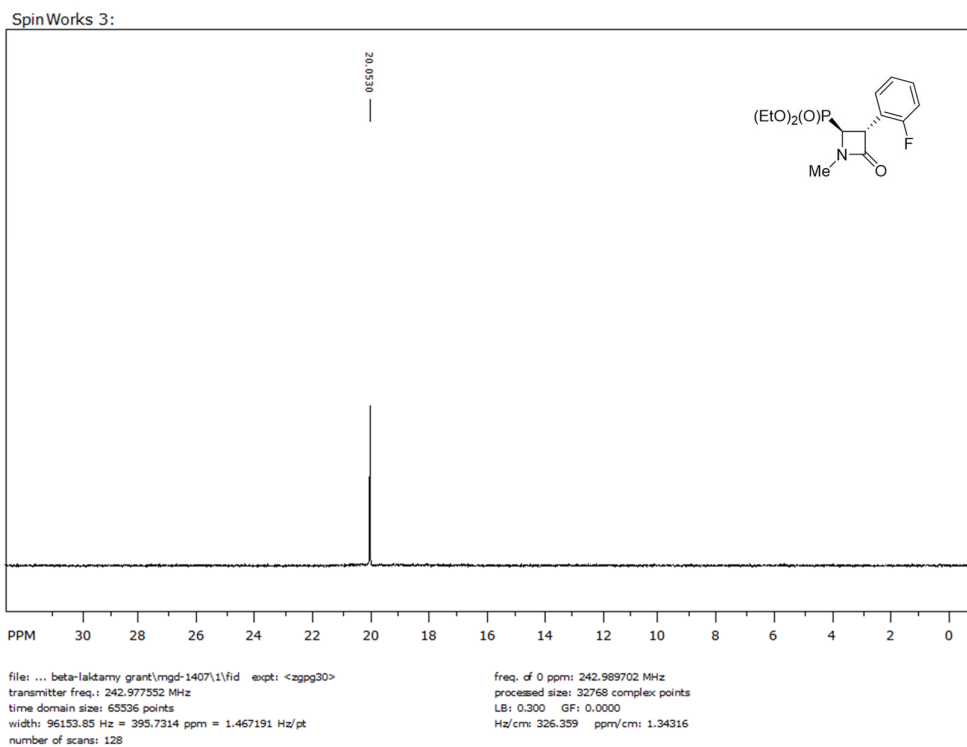

Figure S6:  $^{31}\text{P}$  NMR Spectrum for *trans*-10b in  $\text{CDCl}_3$

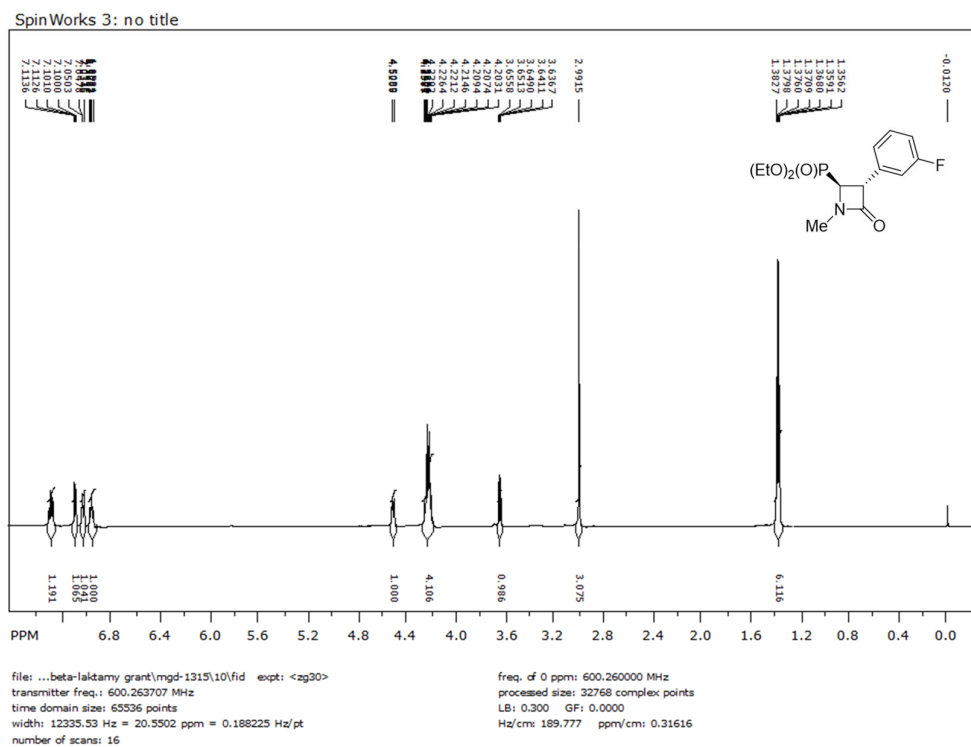

Figure S7:  $^1\text{H}$  NMR Spectrum for *trans*-10c in  $\text{CDCl}_3$

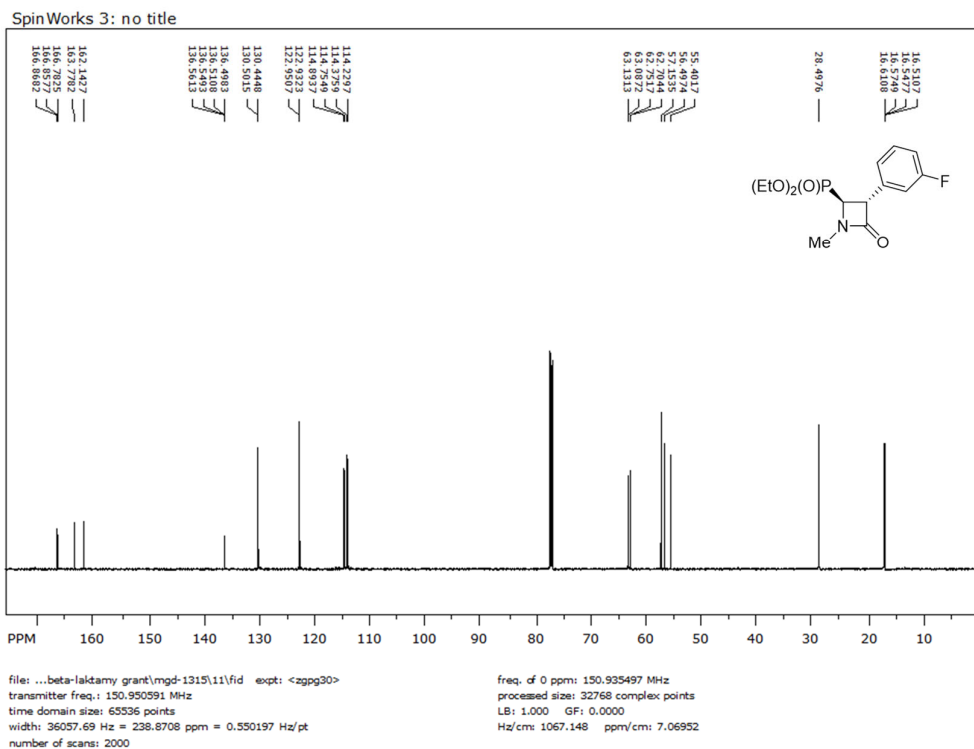

Figure S8:  $^{13}\text{C}$  NMR Spectrum for *trans*-10c in  $\text{CDCl}_3$

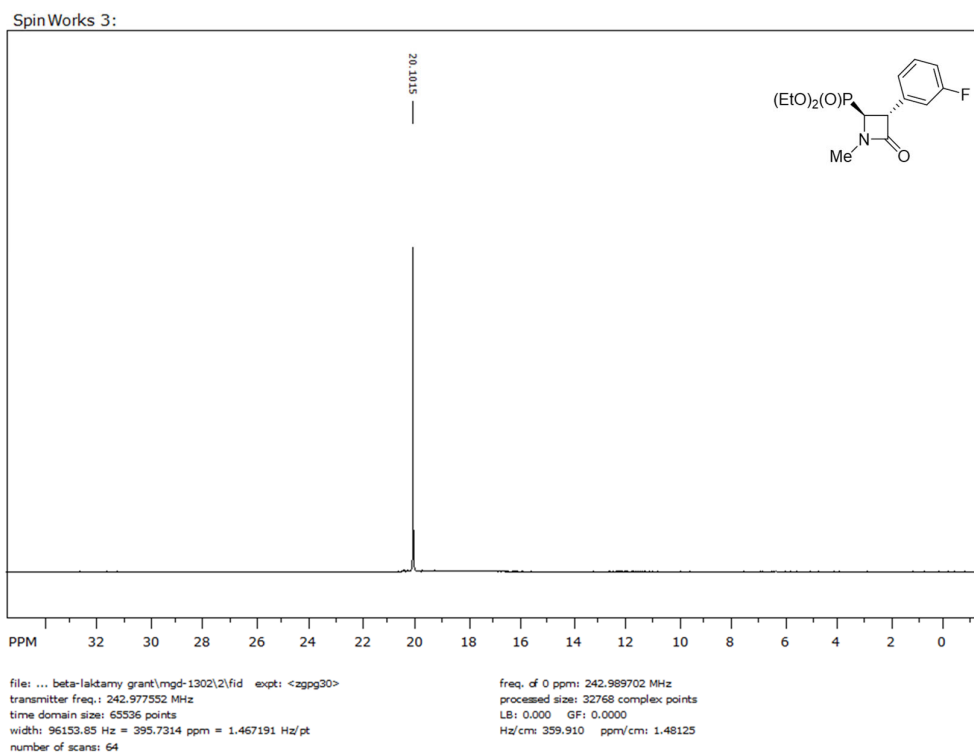

Figure S9:  $^{31}\text{P}$  NMR Spectrum for *trans*-**10c** in  $\text{CDCl}_3$

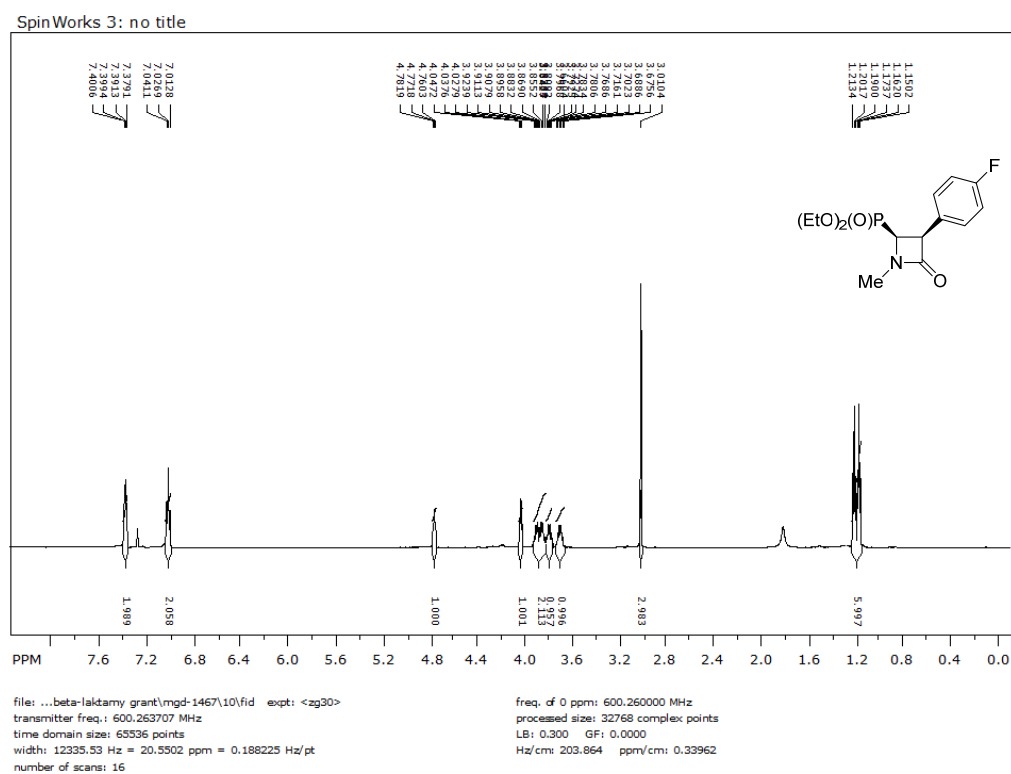

Figure S10:  $^1\text{H}$  NMR Spectrum for *cis*-**10d** in  $\text{CDCl}_3$

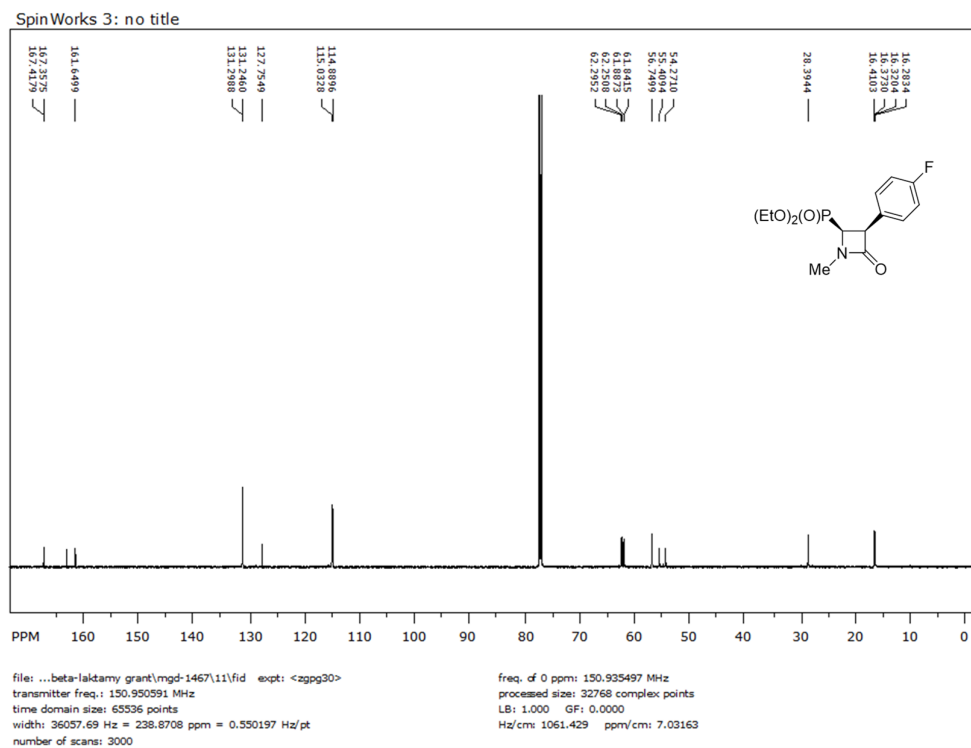

Figure S11:  $^{13}\text{C}$  NMR Spectrum for *cis*-**10d** in  $\text{CDCl}_3$

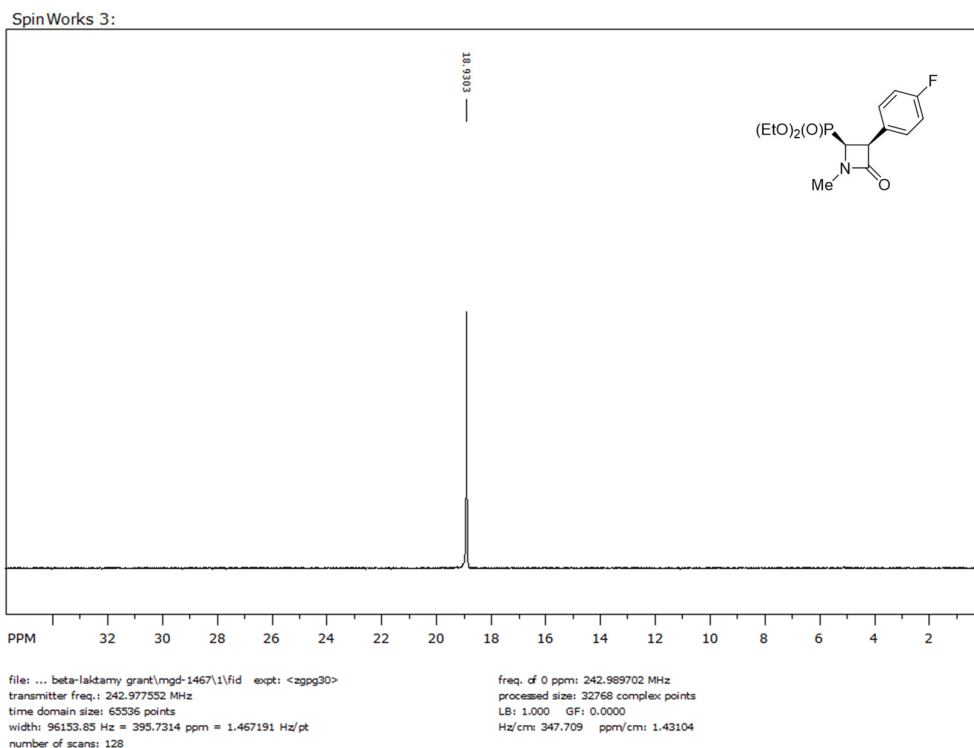

Figure S12:  $^{31}\text{P}$  NMR Spectrum for *cis*-**10d** in  $\text{CDCl}_3$

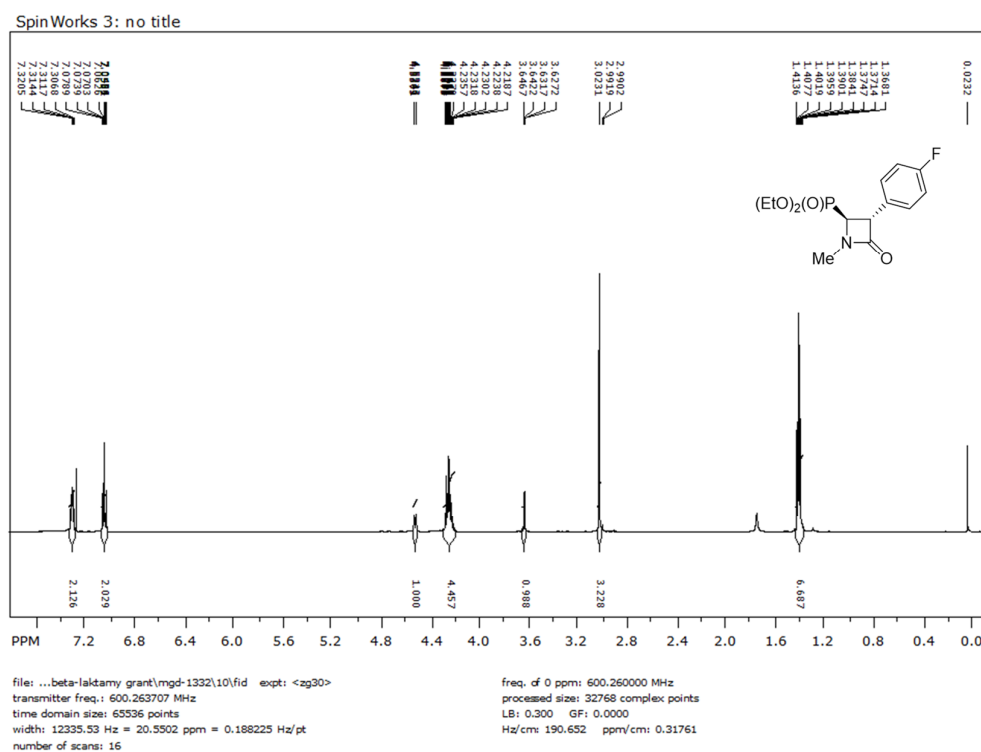

Figure S13:  $^1\text{H}$  NMR Spectrum for *trans*-**10d** in  $\text{CDCl}_3$

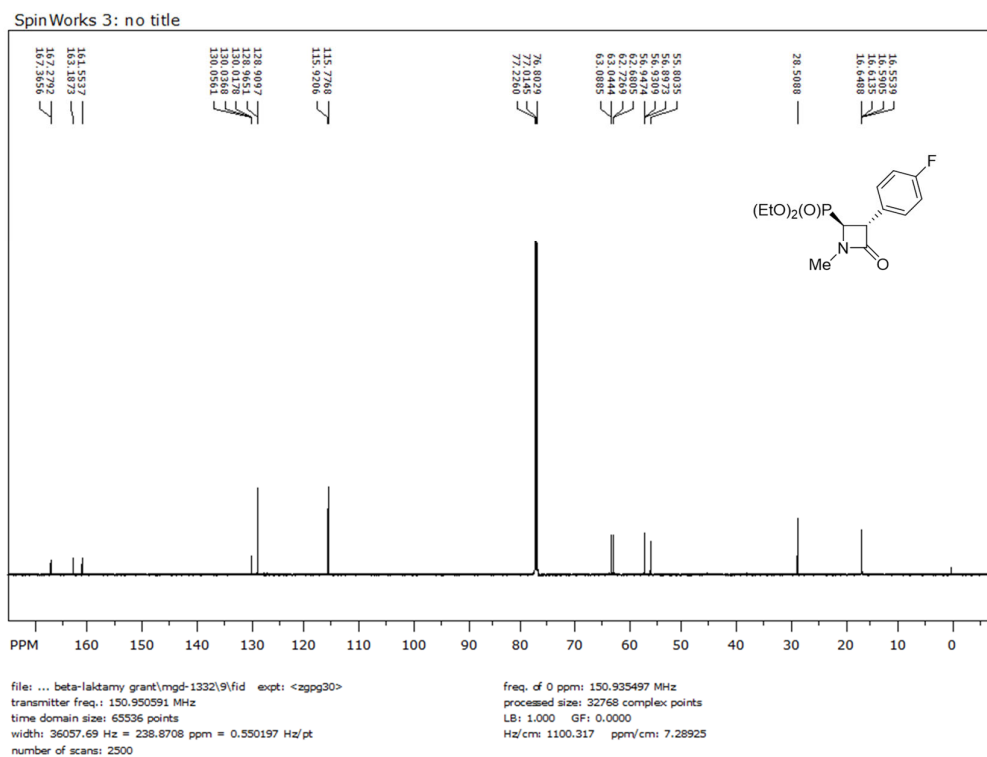

Figure S14:  $^{13}\text{C}$  NMR Spectrum for *trans*-**10d** in  $\text{CDCl}_3$

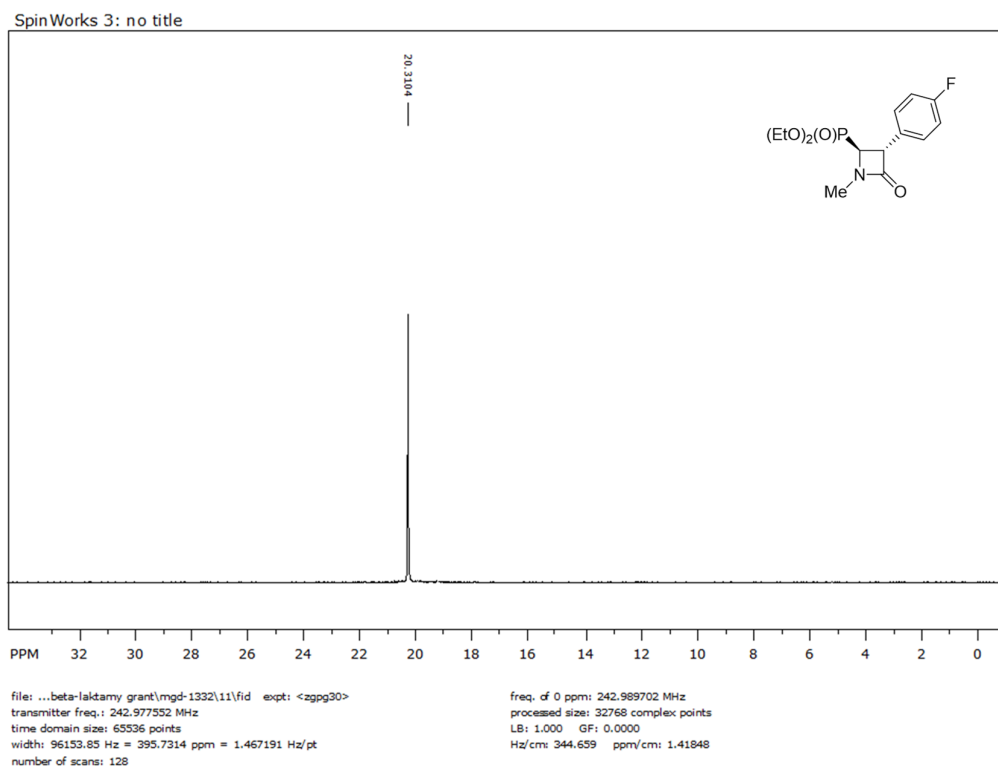

Figure S15:  $^{31}\text{P}$  NMR Spectrum for *trans*-**10d** in  $\text{CDCl}_3$

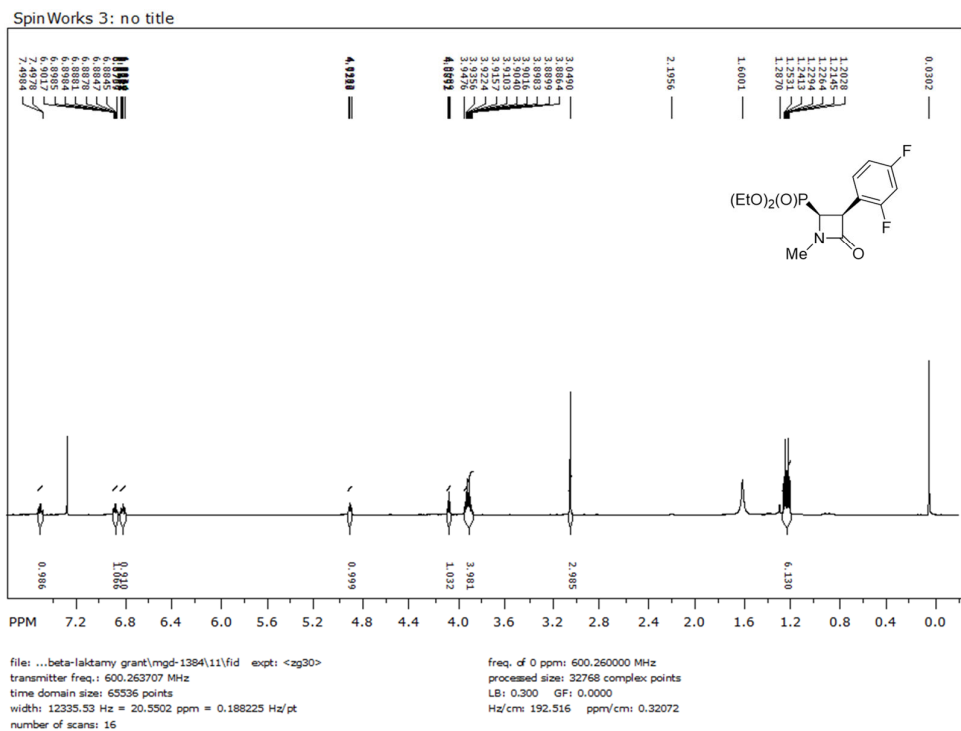

Figure S16:  $^1\text{H}$  NMR Spectrum for *cis*-**10e** in  $\text{CDCl}_3$

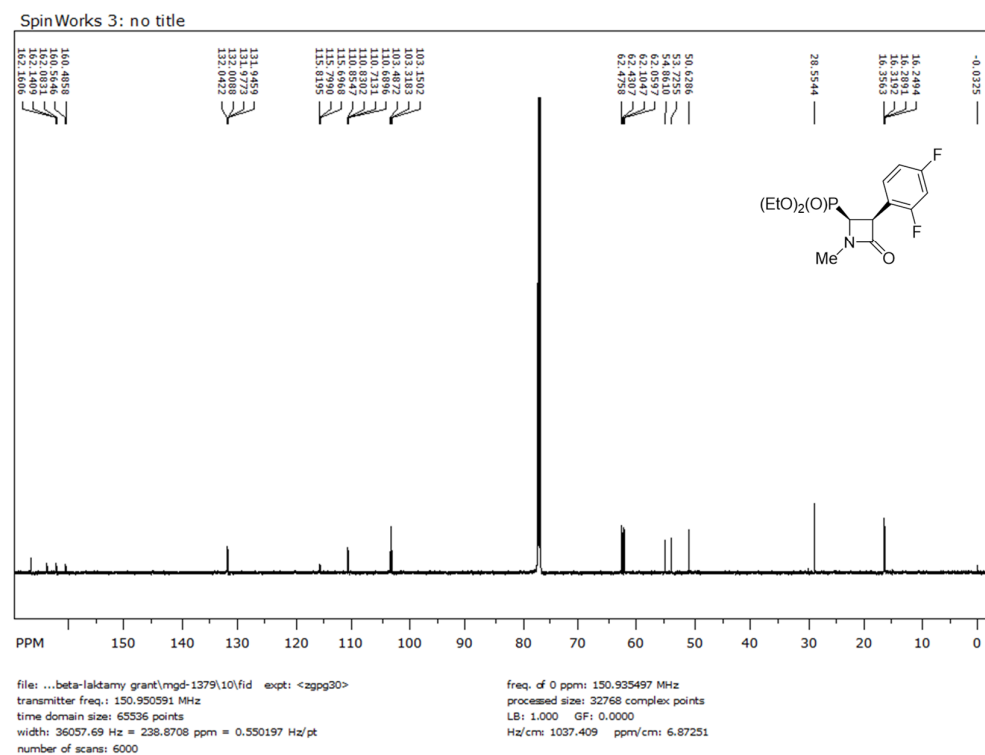

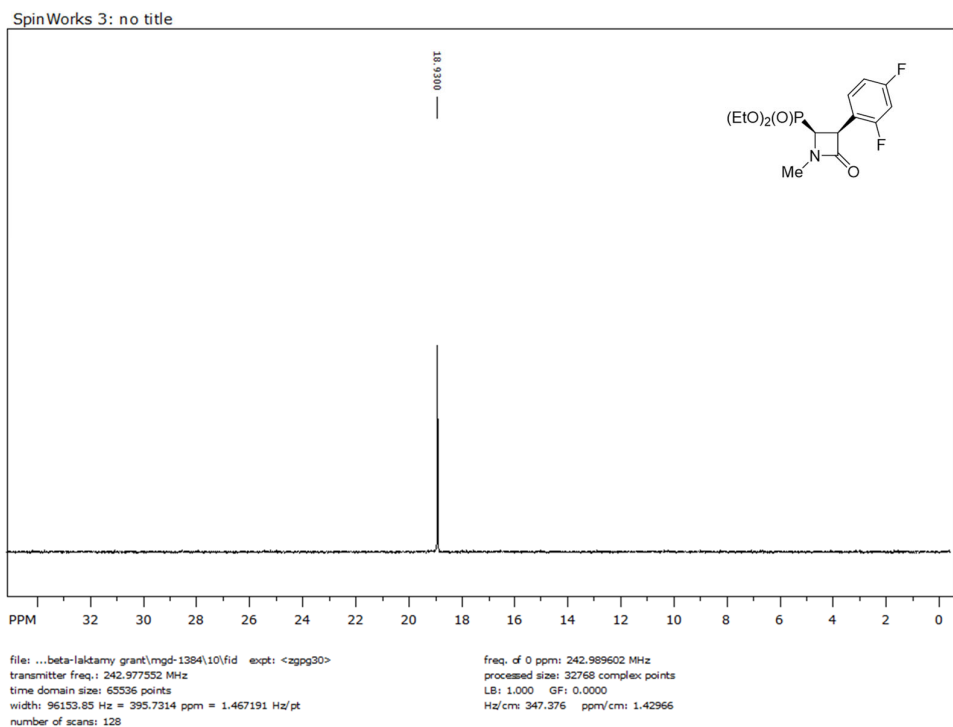

Figure S18:  $^{31}\text{P}$  NMR Spectrum for *cis*-**10e** in  $\text{CDCl}_3$

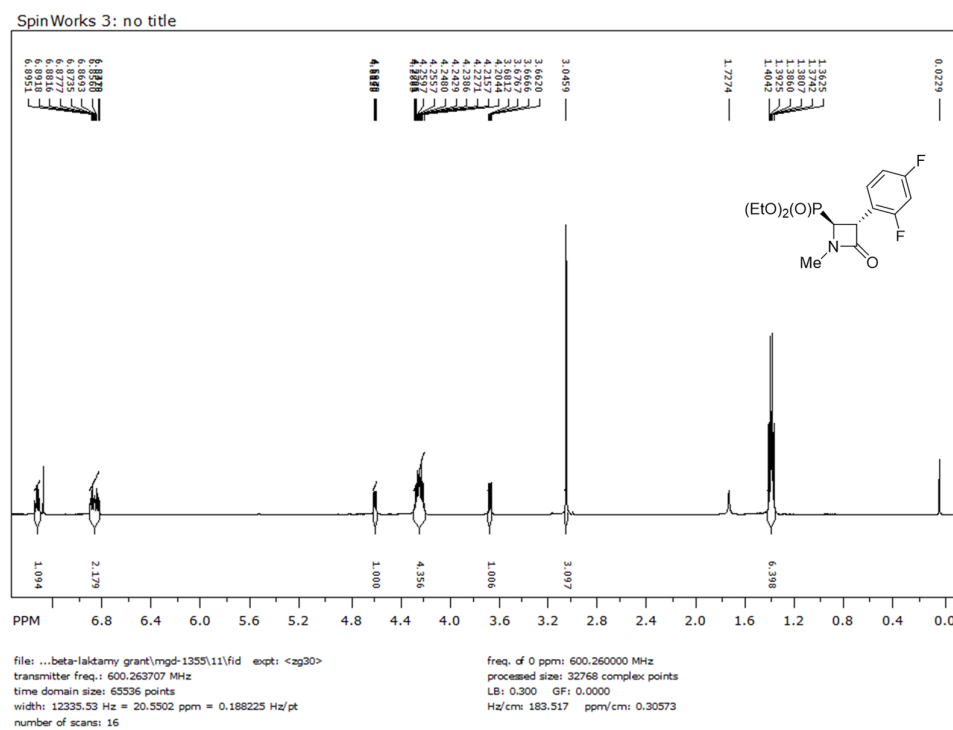

Figure S19:  $^1\text{H}$  NMR Spectrum for *trans*-**10e** in  $\text{CDCl}_3$

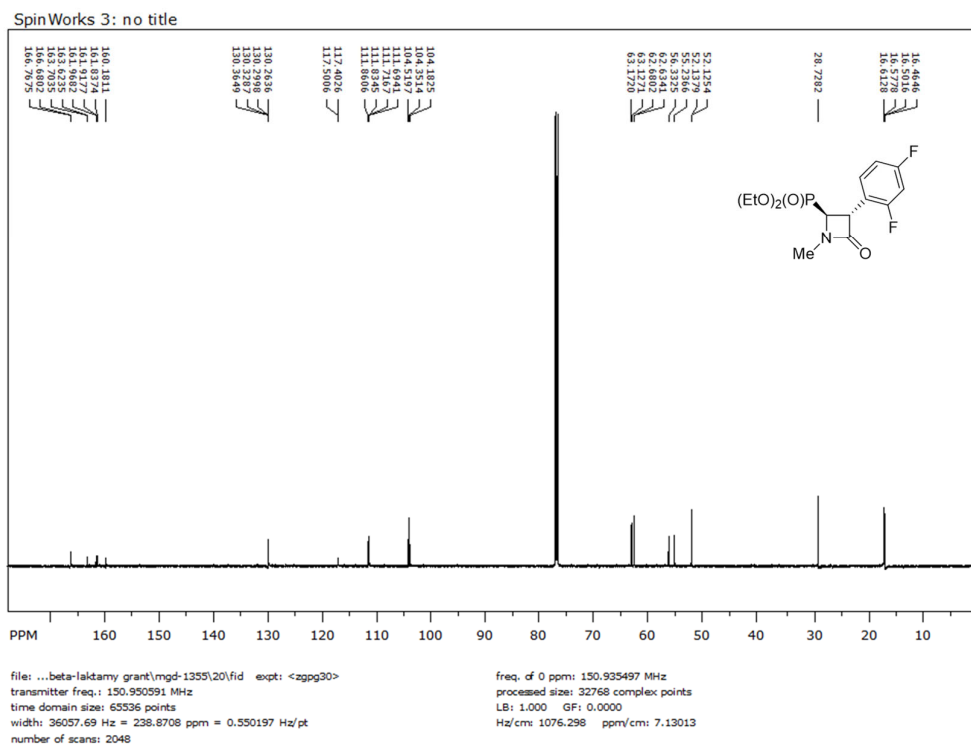

Figure S20:  $^{13}\text{C}$  NMR Spectrum for *trans*-**10e** in  $\text{CDCl}_3$

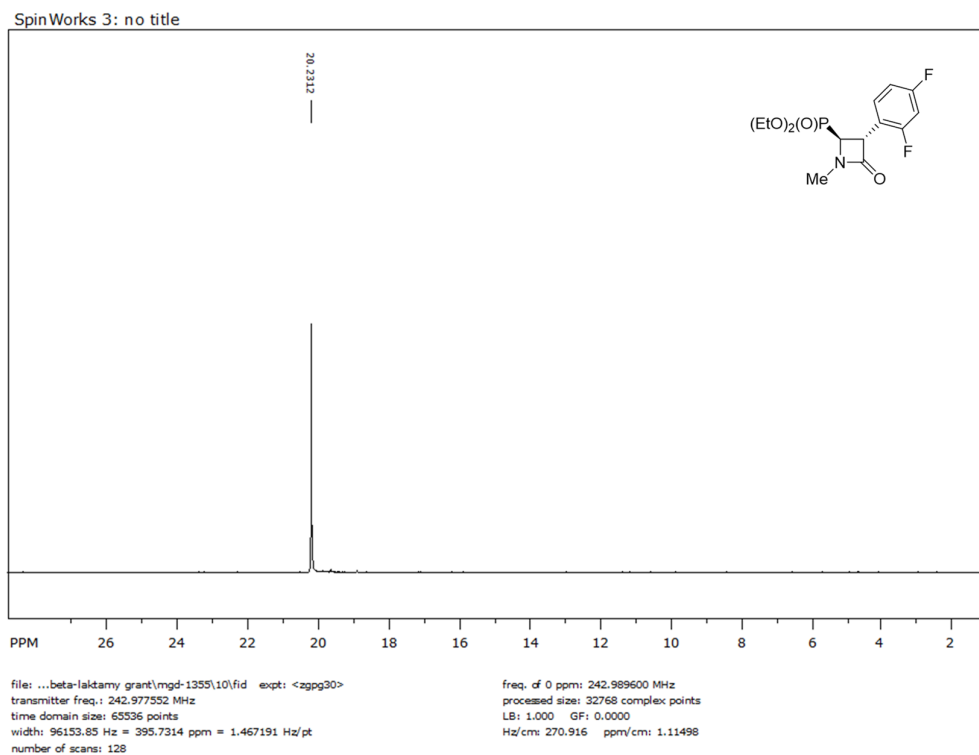

Figure S21:  $^{31}\text{P}$  NMR Spectrum for *trans*-**10e** in  $\text{CDCl}_3$





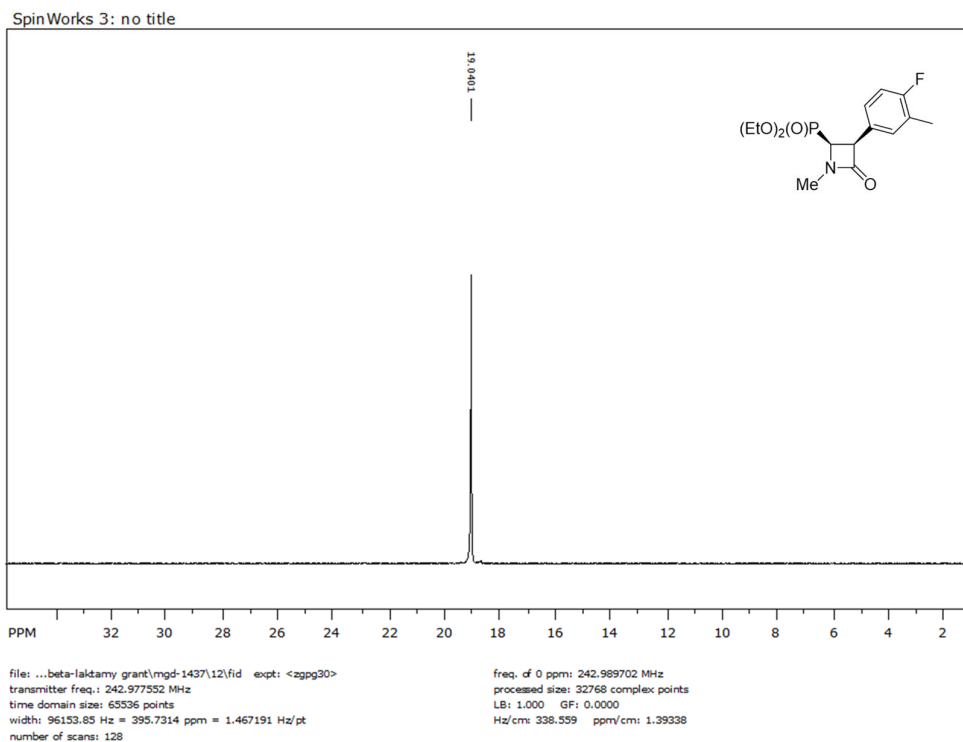

Figure S24:  $^{31}\text{P}$  NMR Spectrum for *cis*-**10f** in  $\text{CDCl}_3$

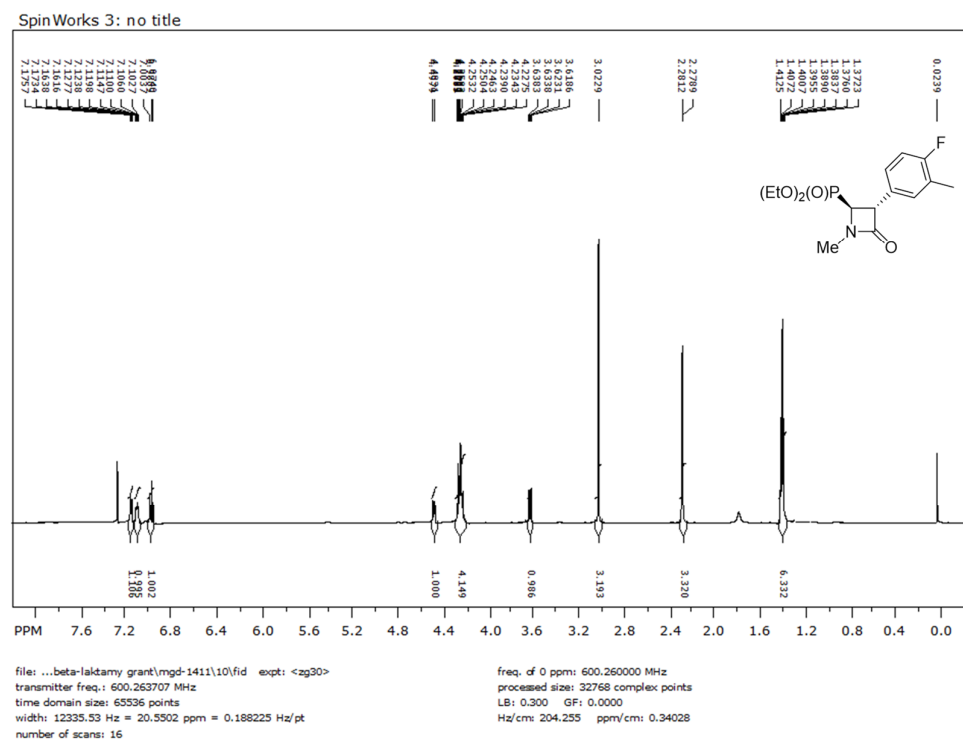

Figure S25:  $^1\text{H}$  NMR Spectrum for *trans*-**10f** in  $\text{CDCl}_3$

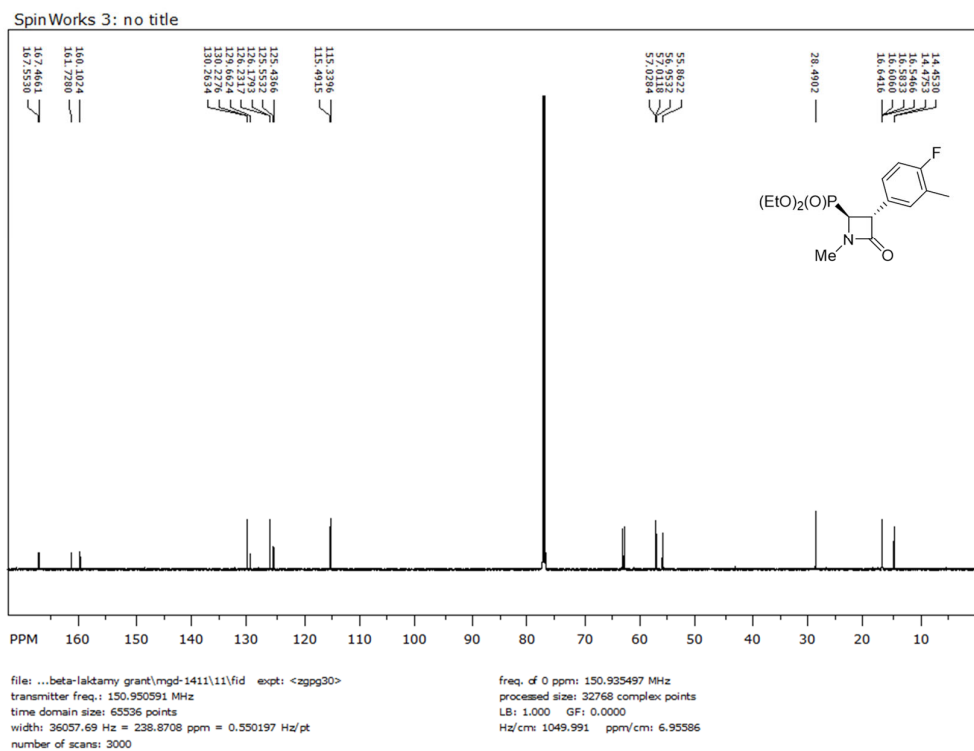

Figure S26:  $^{13}\text{C}$  NMR Spectrum for *trans*-**10f** in  $\text{CDCl}_3$

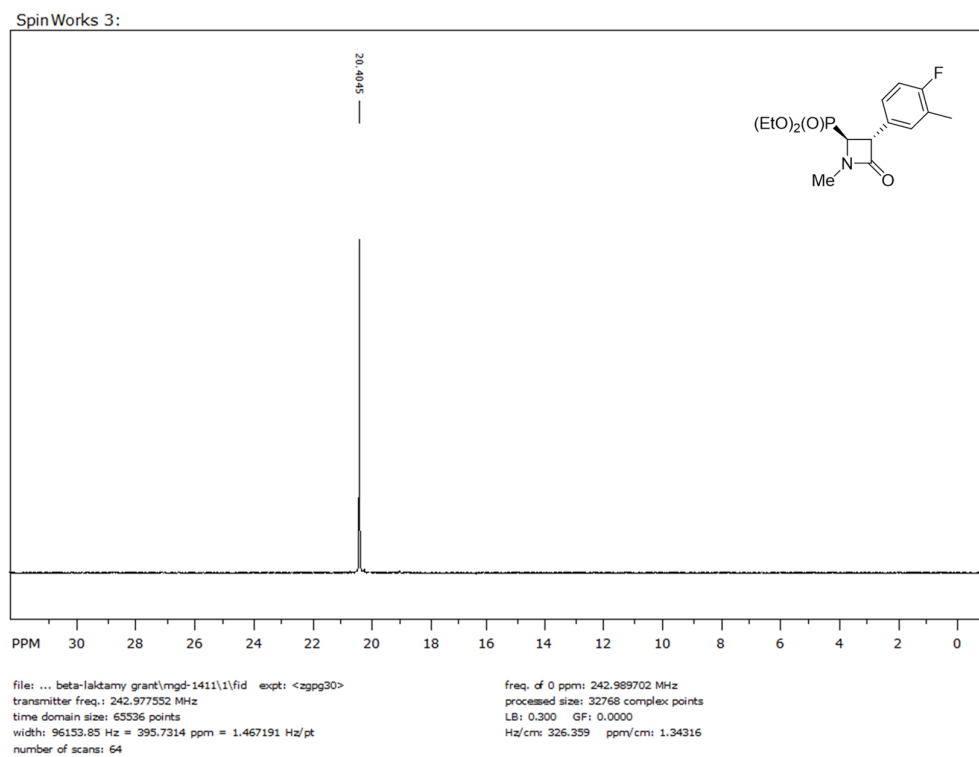

Figure S27:  $^{31}\text{P}$  NMR Spectrum for *trans*-**10f** in  $\text{CDCl}_3$





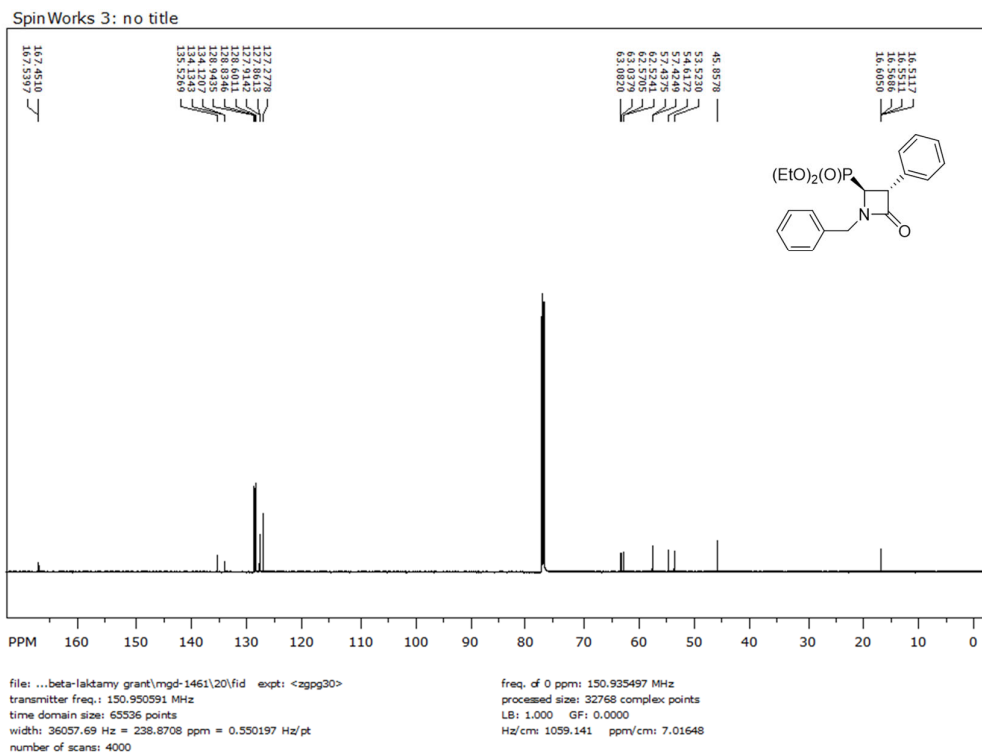

Figure S32:  $^{13}\text{C}$  NMR Spectrum for *trans*-**11a** in  $\text{CDCl}_3$

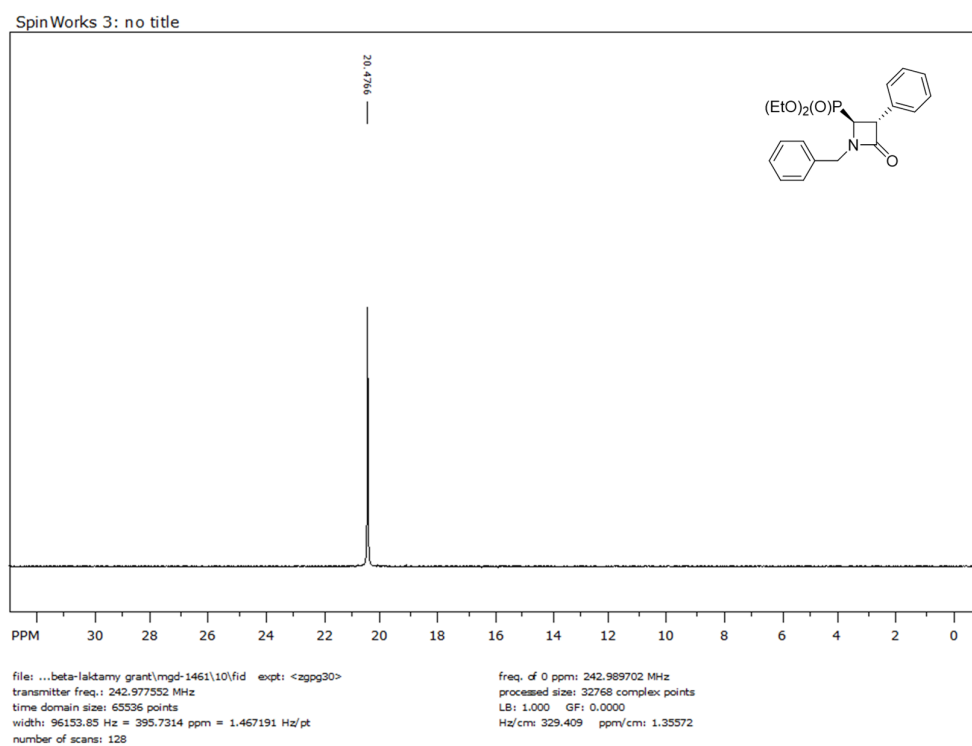

Figure S33:  $^{31}\text{P}$  NMR Spectrum for *trans*-**11a** in  $\text{CDCl}_3$







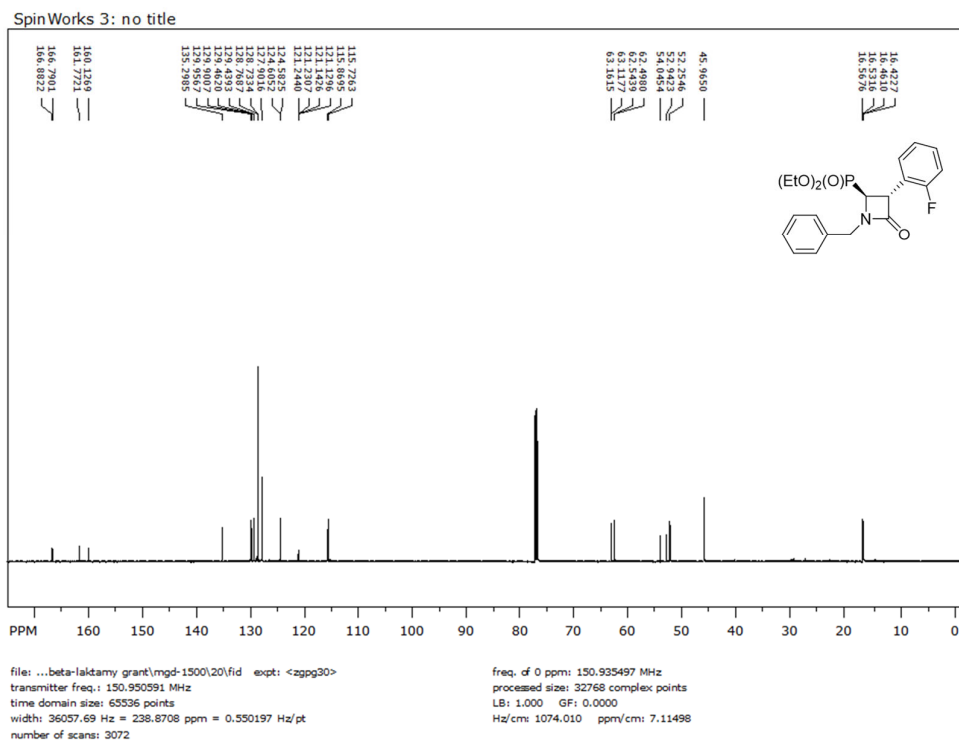

Figure S38:  $^{13}\text{C}$  NMR Spectrum for *trans*-**11b** in  $\text{CDCl}_3$

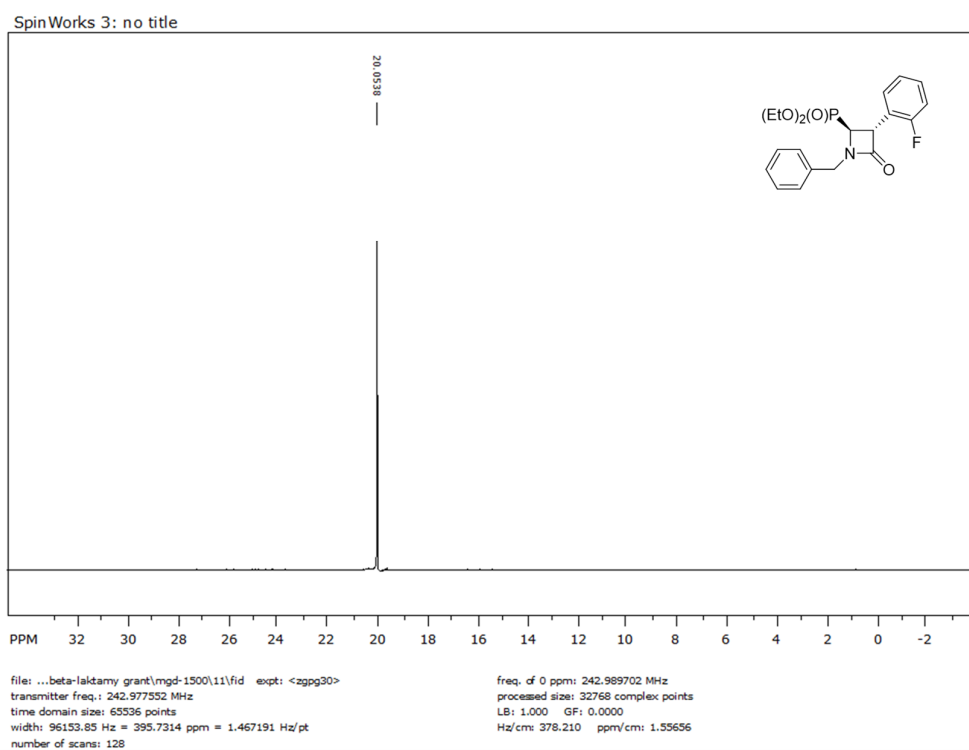

Figure S39:  $^{31}\text{P}$  NMR Spectrum for *trans*-**11b** in  $\text{CDCl}_3$



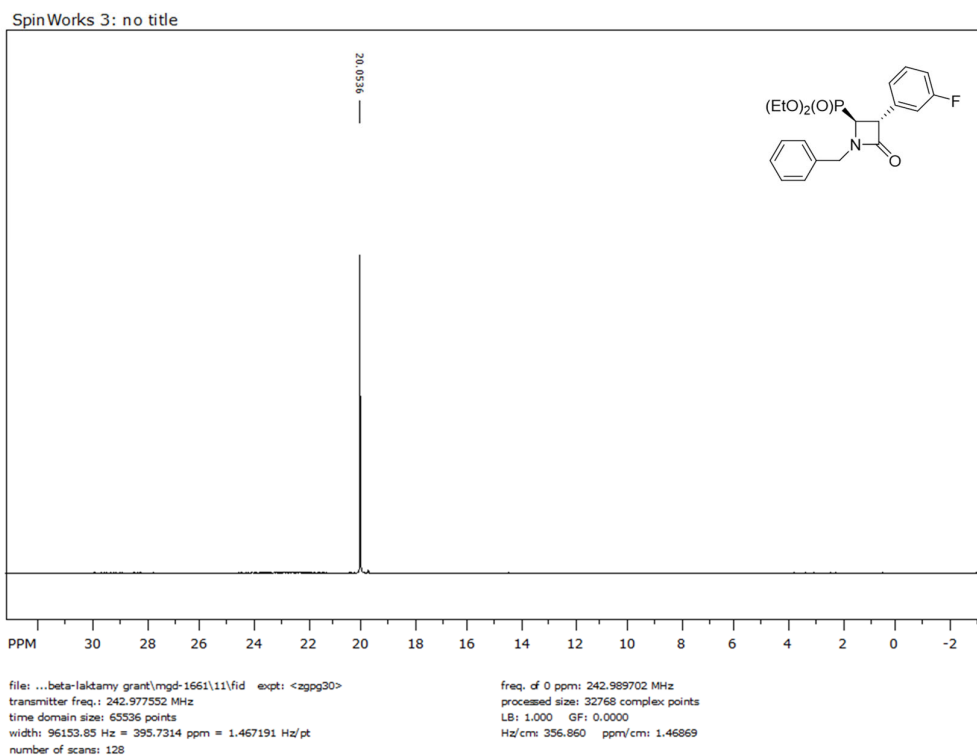

Figure S42:  $^{31}\text{P}$  NMR Spectrum for *trans*-11c in  $\text{CDCl}_3$

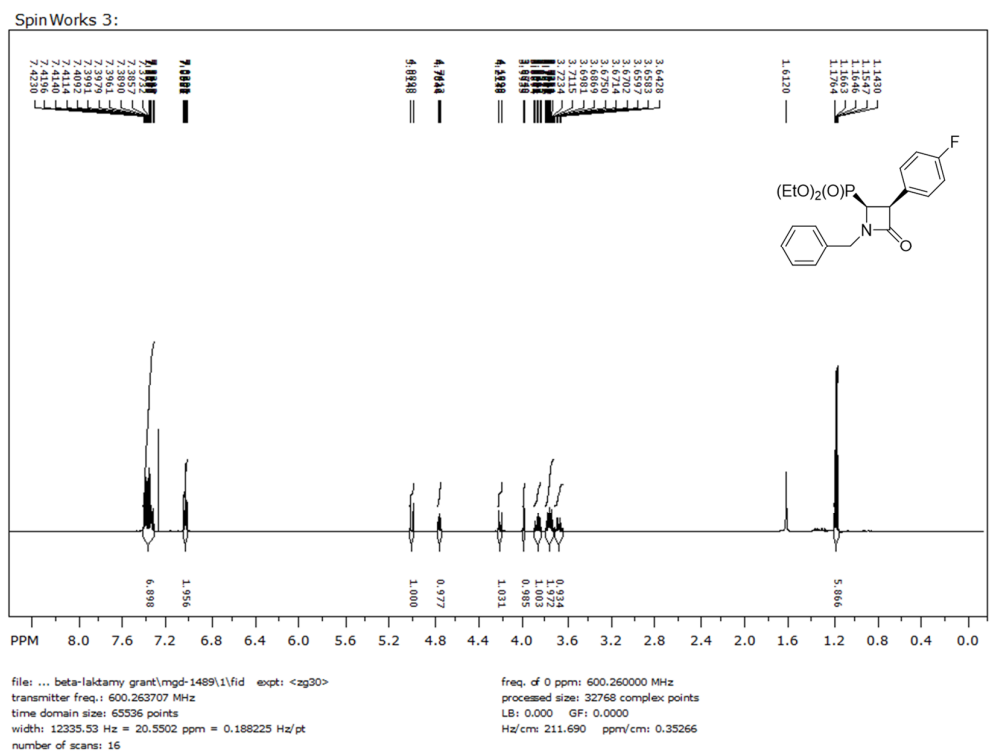

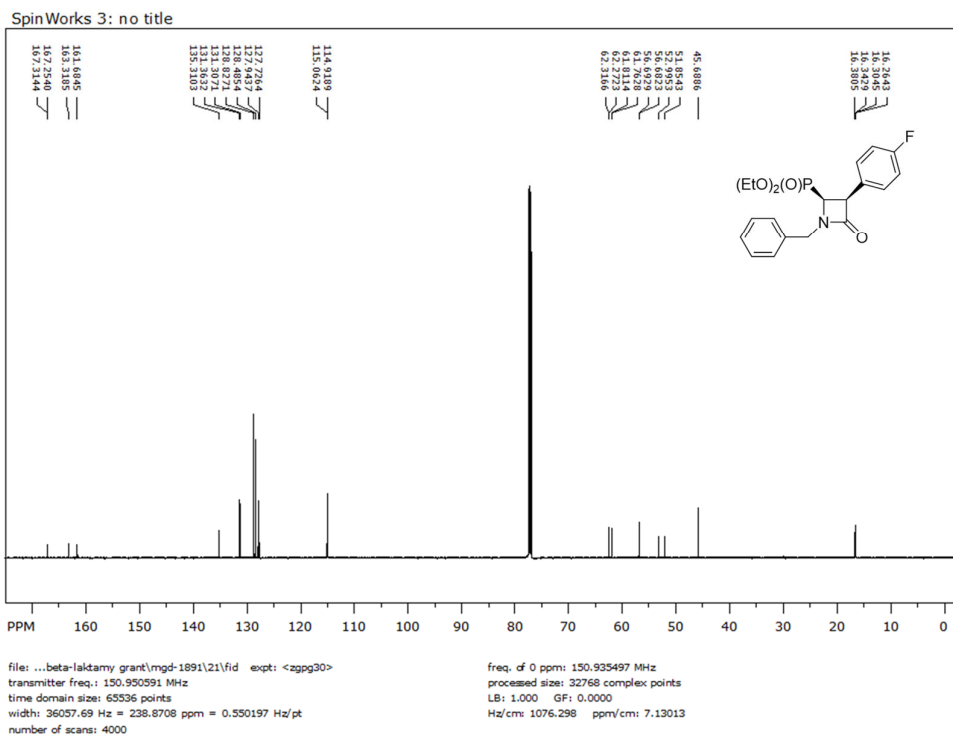

Figure S44:  $^{13}\text{C}$  NMR Spectrum for *cis*-**11d** in  $\text{CDCl}_3$

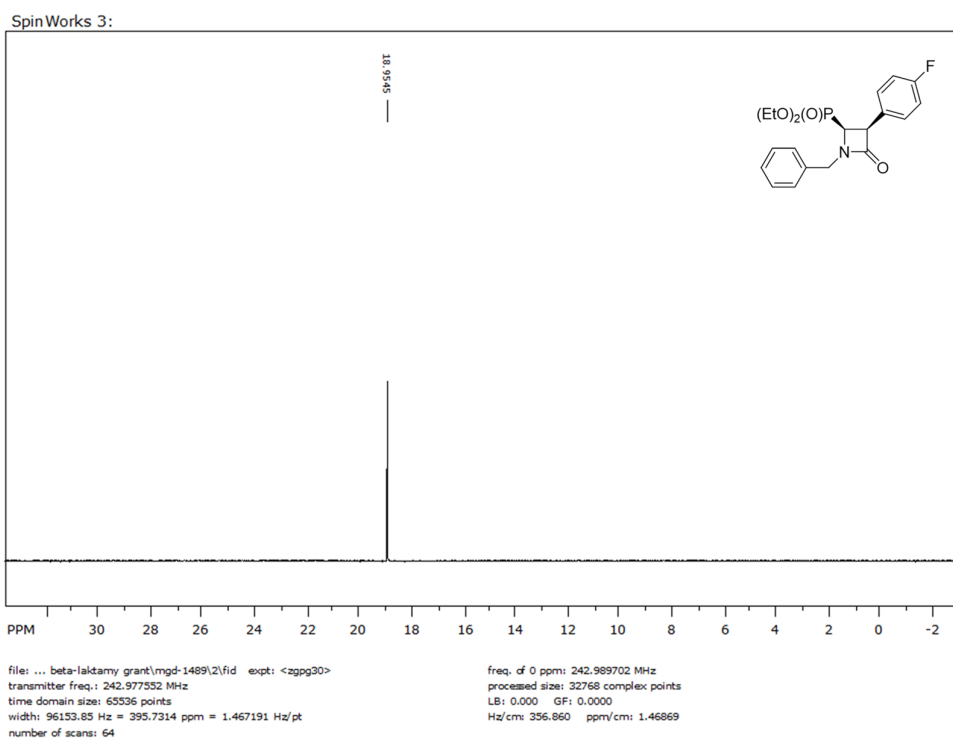

Figure S45:  $^{31}\text{P}$  NMR Spectrum for *cis*-**11d** in  $\text{CDCl}_3$

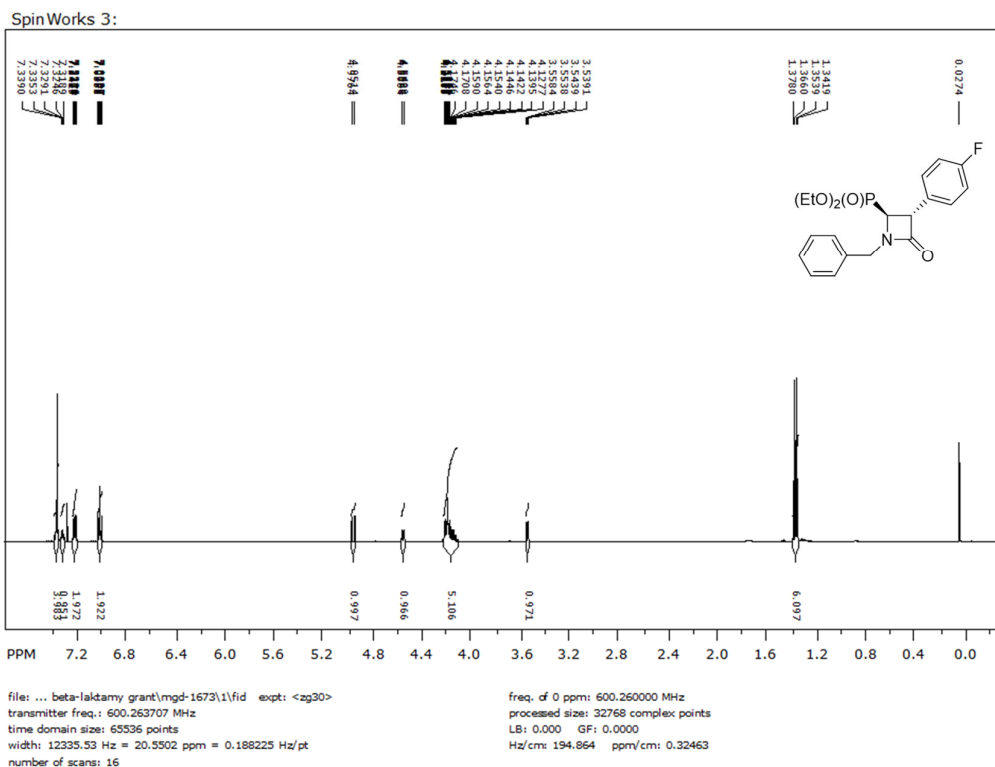

Figure S46:  $^1\text{H}$  NMR Spectrum for *trans*-**11d** in  $\text{CDCl}_3$

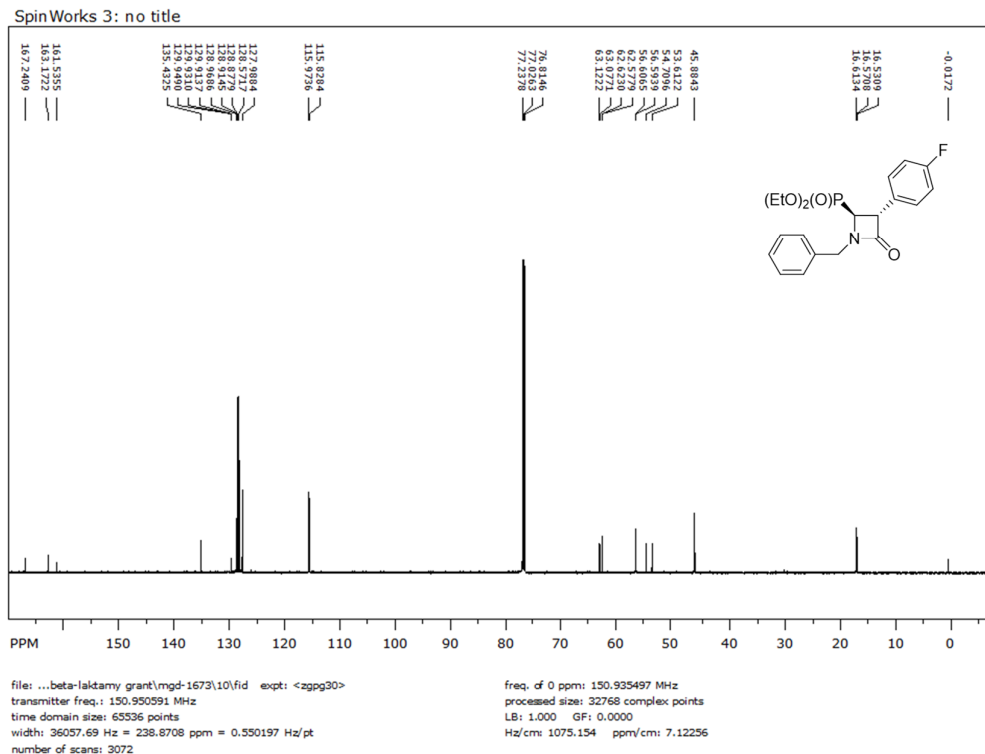

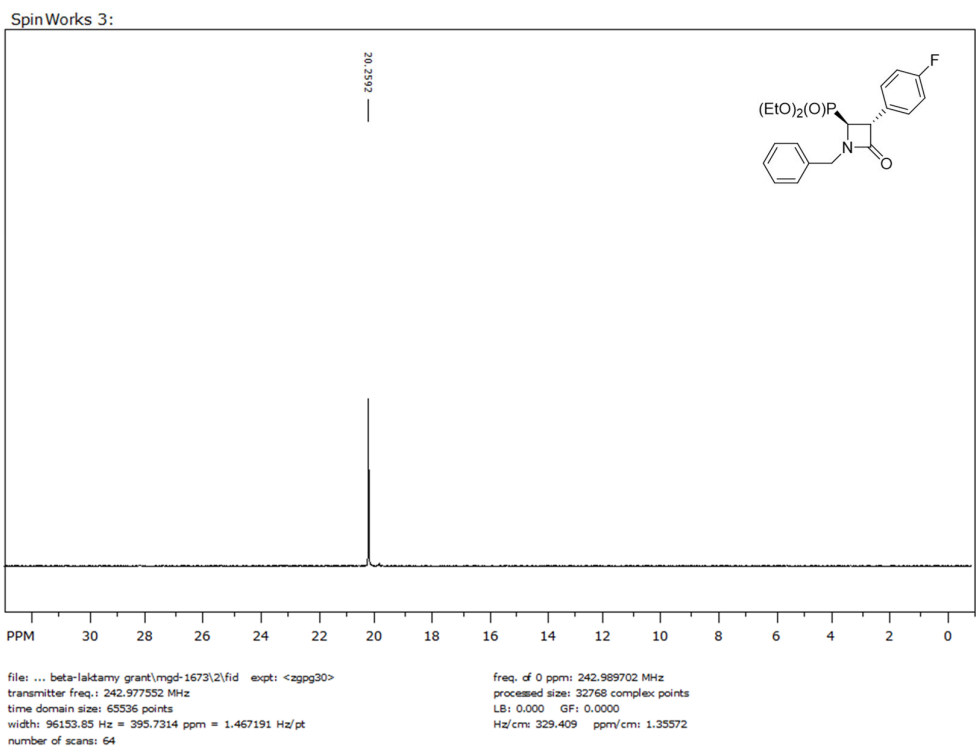

Figure S48:  $^{31}\text{P}$  NMR Spectrum for *trans*-**11d** in  $\text{CDCl}_3$

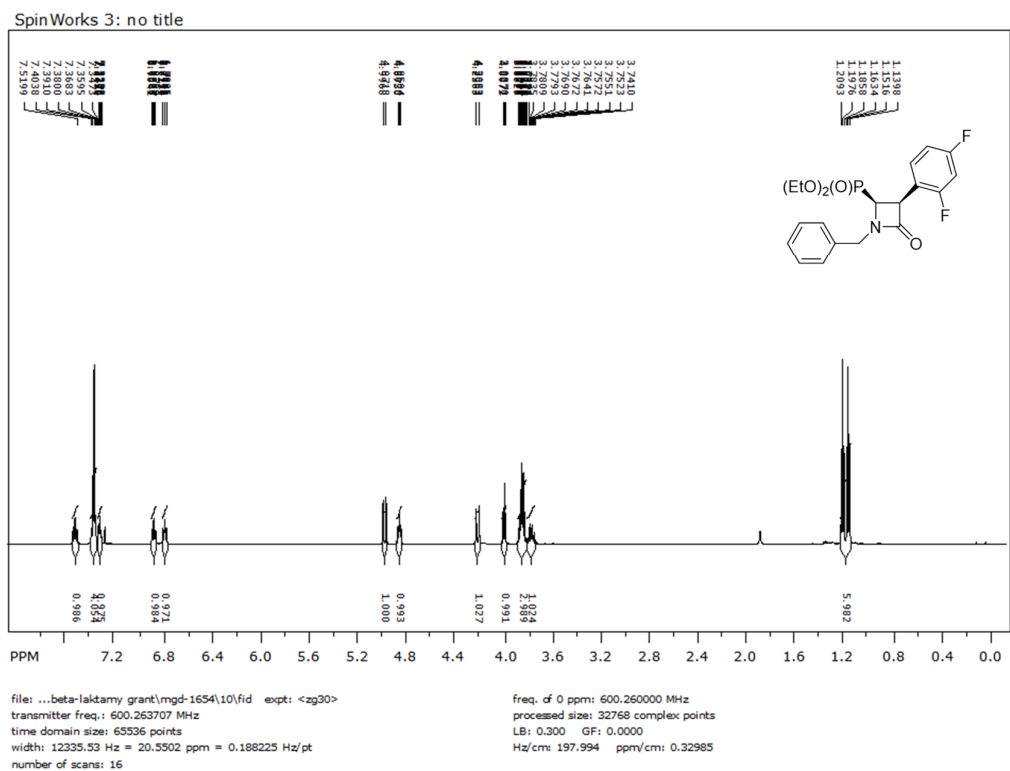

Figure S49:  $^1\text{H}$  NMR Spectrum for *cis*-**11e** in  $\text{CDCl}_3$

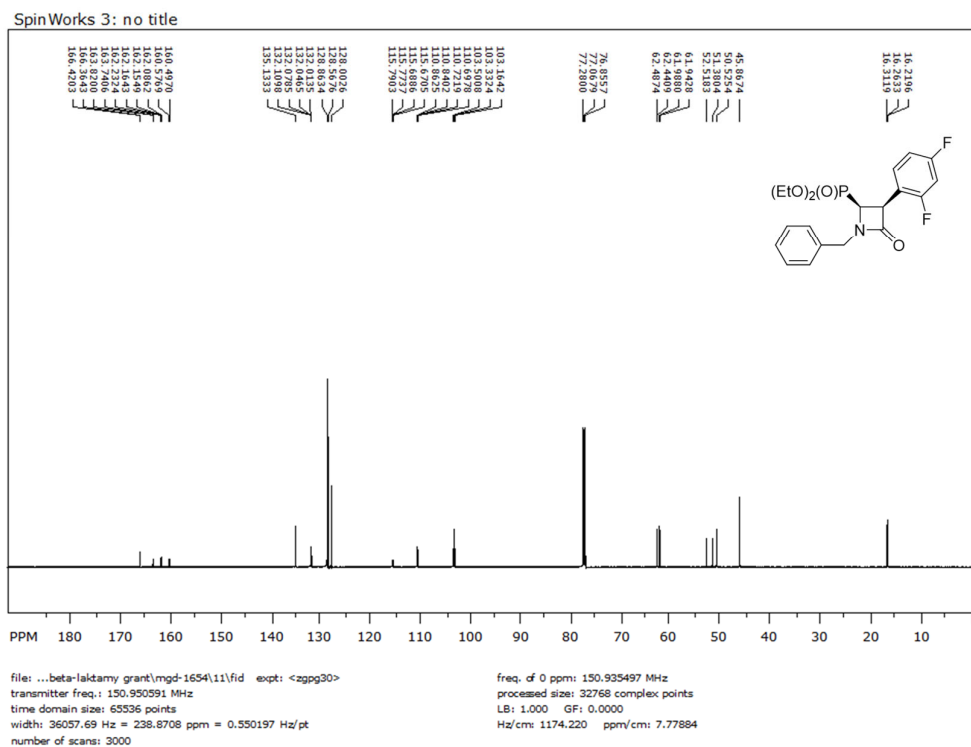

Figure S50:  $^{13}\text{C}$  NMR Spectrum for *cis*-**11e** in  $\text{CDCl}_3$

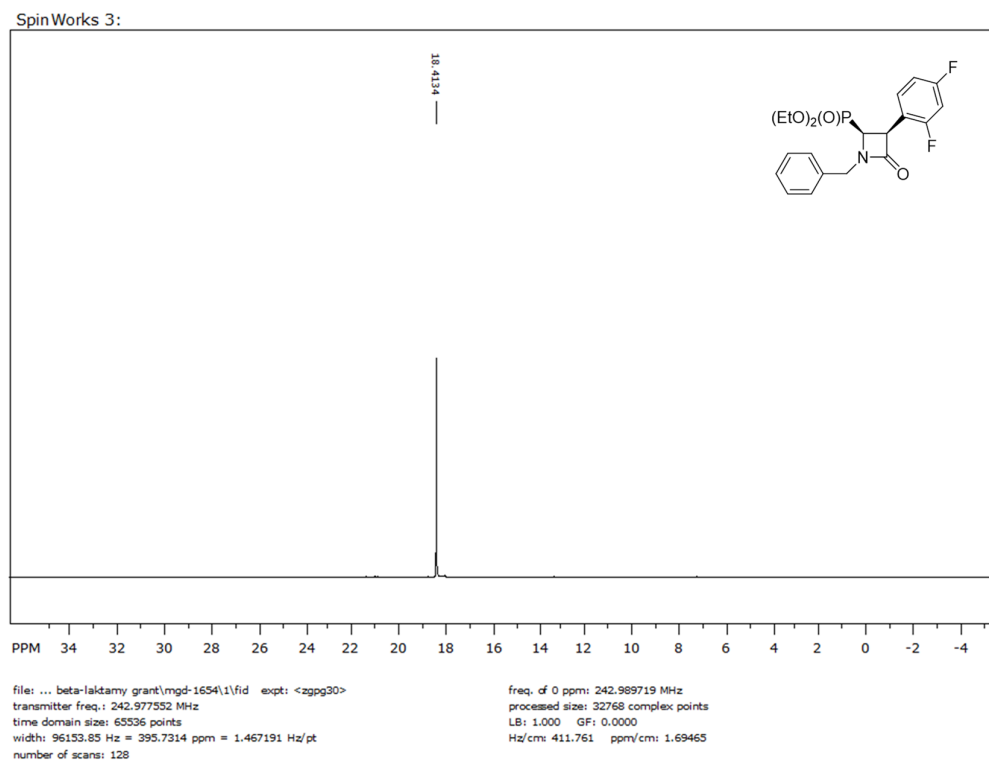

Figure S51:  $^{31}\text{P}$  NMR Spectrum for *cis*-**11e** in  $\text{CDCl}_3$

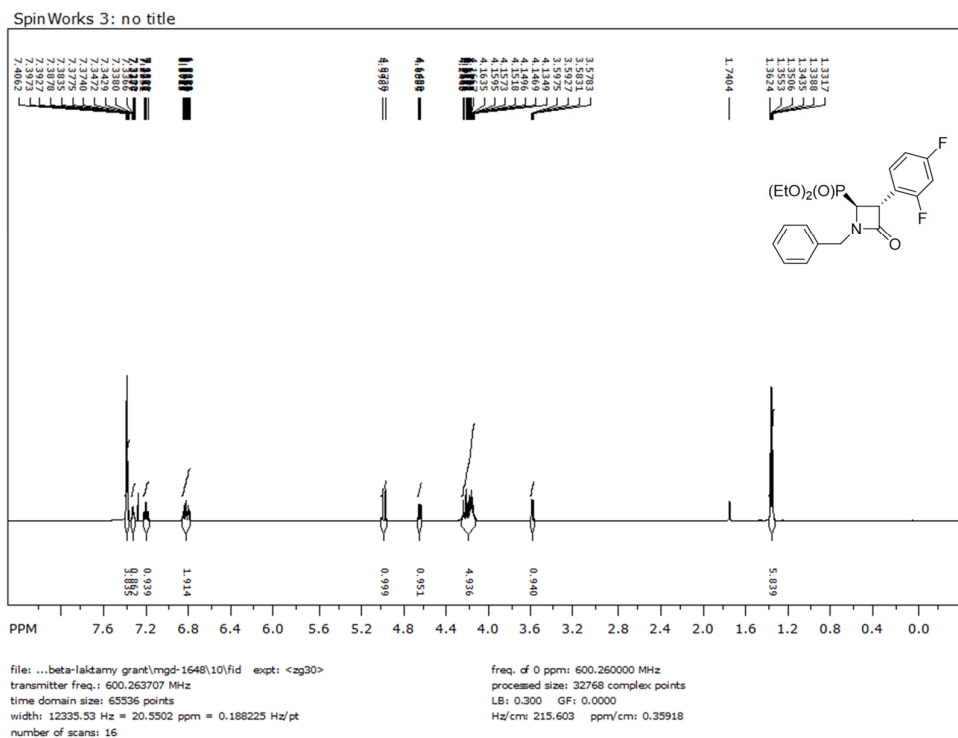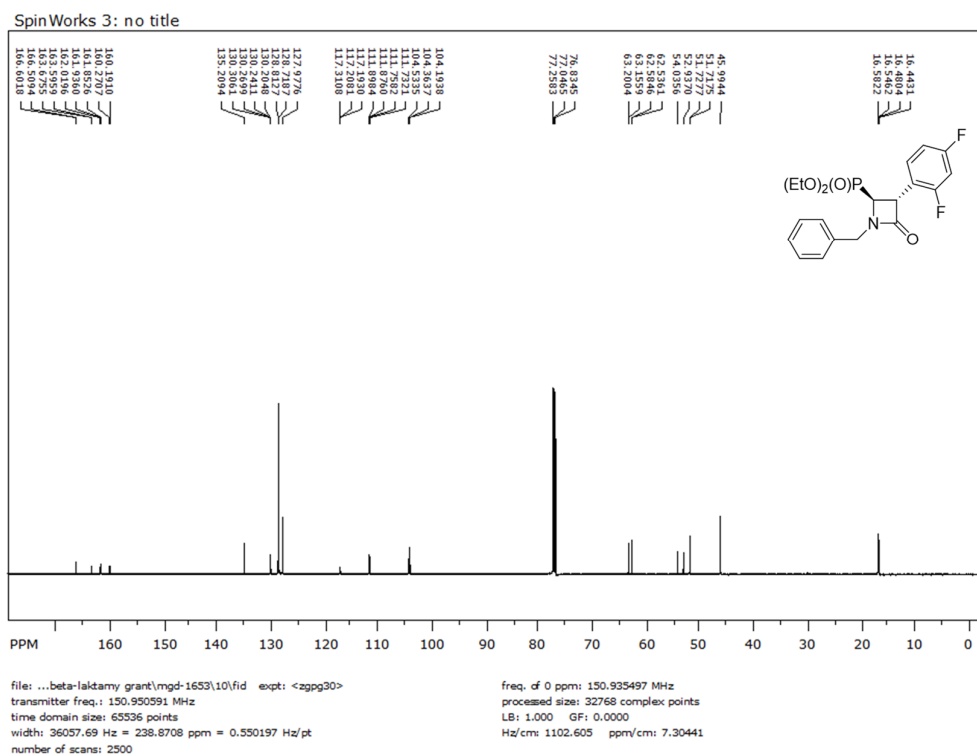



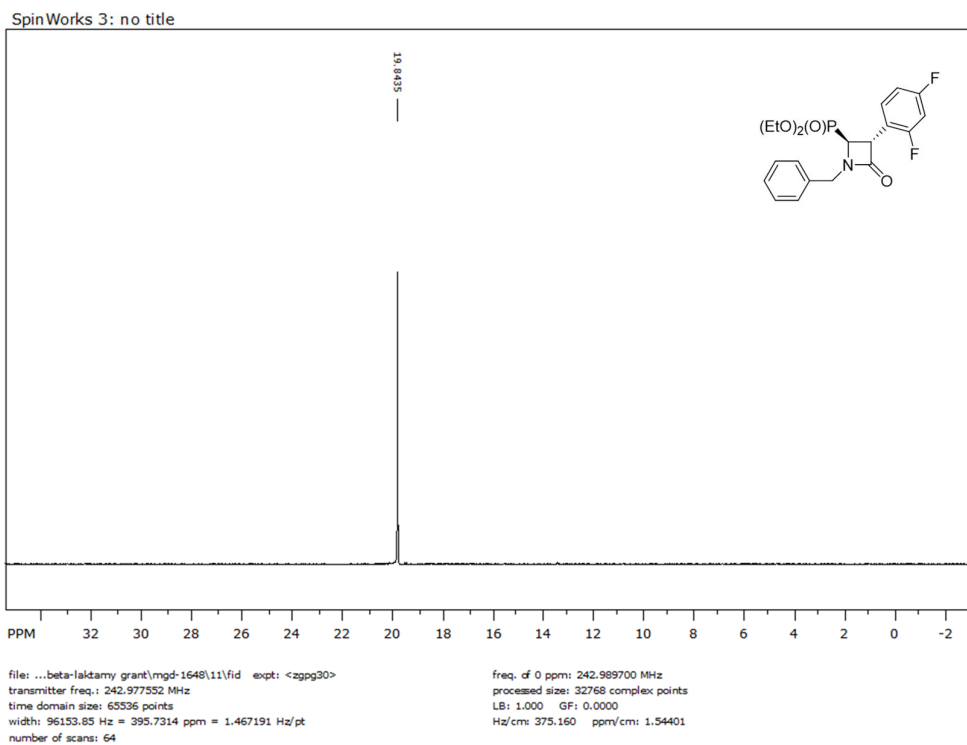

Figure S54:  $^{31}\text{P}$  NMR Spectrum for *trans*-**11e** in  $\text{CDCl}_3$

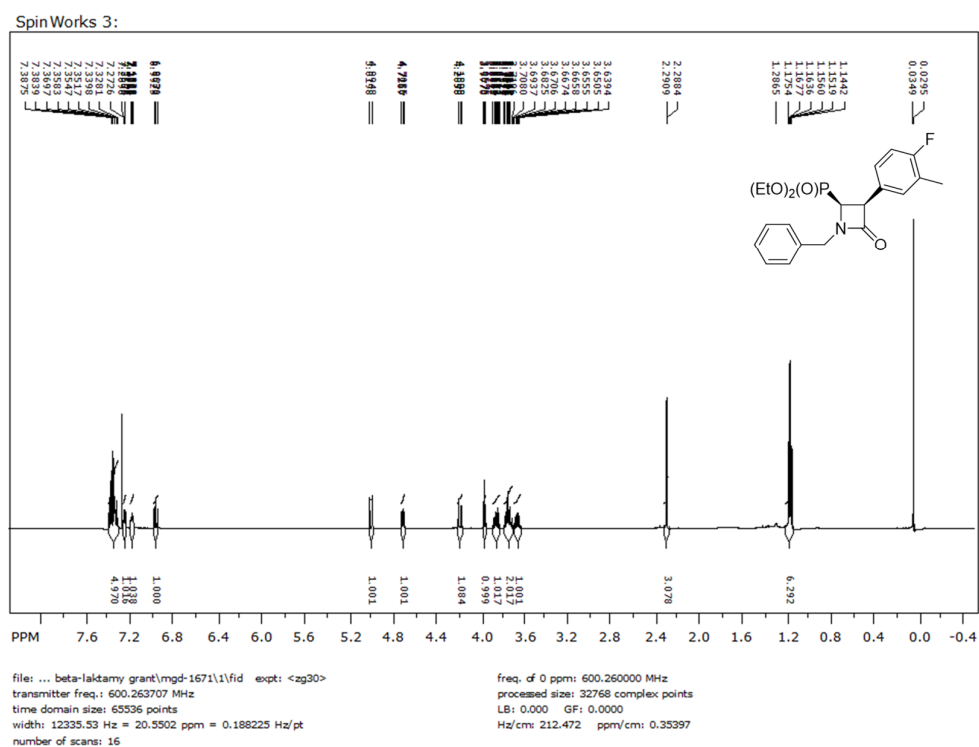

Figure S55:  $^1\text{H}$  NMR Spectrum for *cis*-**11f** in  $\text{CDCl}_3$

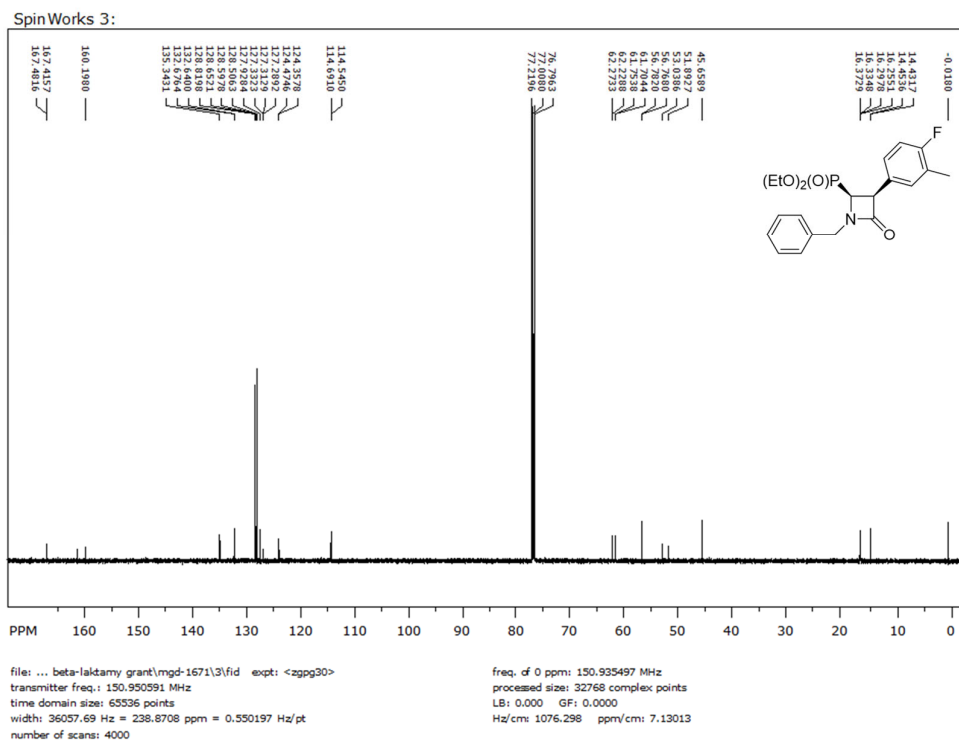

Figure S56:  $^{13}\text{C}$  NMR Spectrum for *cis*-**11f** in  $\text{CDCl}_3$

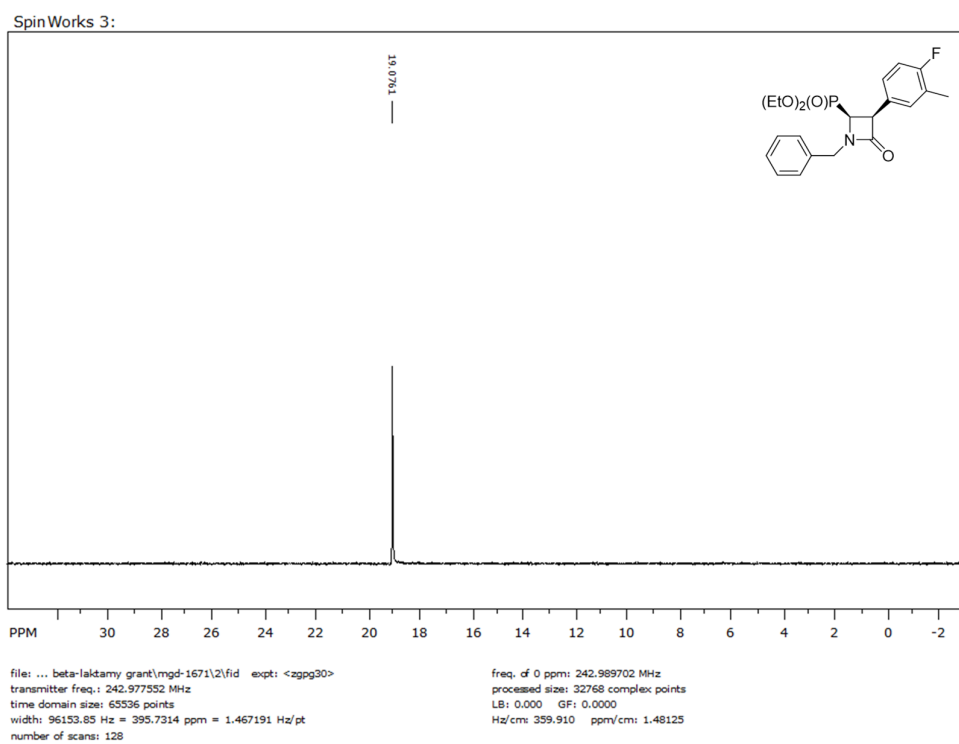

Figure S57:  $^{31}\text{P}$  NMR Spectrum for *cis*-**11f** in  $\text{CDCl}_3$



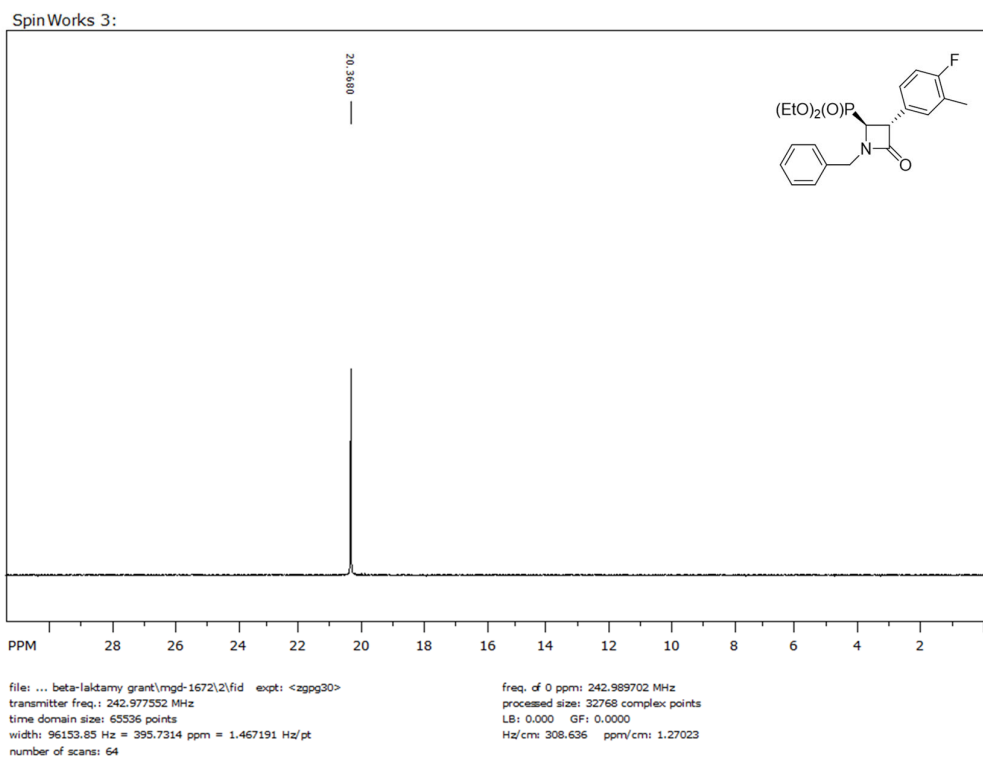

Figure S60:  $^{31}\text{P}$  NMR Spectrum for *trans*-**11f** in  $\text{CDCl}_3$
